# Supplementary material for: A new mode of cyclobutenedione ring opening for the synthesis of 2-oxobut-3-enamides and tetrasubstituted furans
Source: Royal Society of Chemistry journal article supplement (doi:10.1039/d1cc02097h), 2021-01-01
Supplement: d1cc02097h1.pdf [file d1cc02097h1.pdf]

## 1. General Remarks

Tetrahydrofuran, hexane and pentane were all distilled from sodium benzophenone ketyl under argon. All air sensitive reactions were carried out under argon using flame dried apparatus. Reactions were monitored by TLC on Merck Silica Gel 60 Å F TLC plates and visualised with 254 nm UV followed by aqueous 1% KMnO<sub>4</sub> or CAMPH. Flash chromatography was performed under slight positive pressure on Sigma Aldrich 40–63 μm 60 Å 230–400 Å silica. Reaction and chromatography solvents were removed using a rotary evaporator equipped with a diaphragm pump. <sup>1</sup>H and <sup>13</sup>C NMR spectroscopy was performed on a Bruker AV400 (400/100 MHz) spectrometer at 298 K in CDCl<sub>3</sub>. Chemical shifts are quoted as δ values in ppm using residual solvent peaks as the reference. Coupling constants *J* are given in Hz and multiplicity is described as follows: s, singlet; d, doublet; t, triplet; q, quartet; quin, quintet; m, multiplet; br, broad. HRMS data were obtained using a Bruker APEX III FT-ICR-MS with samples run in HPLC grade methanol. Electrospray mass spectrometry was performed on a directly injected Waters quadrupole MSD using ESI+ or ESI- ionisation with MeOH as solvent. Infrared spectroscopy was performed on a Nicolet iS5 Laboratory FT-IR spectrometer and spectra were acquired from evaporated CDCl<sub>3</sub> or DCM solutions. Absorption maxima (*v*<sub>max</sub>) are quoted in wavenumbers (cm<sup>-1</sup>) with the following abbreviations used to describe their intensity: s, strong; m, medium; w, weak; br, broad. Cyclobutenones **1a**,<sup>1</sup> **1b**,<sup>2,3</sup> **1c**,<sup>4</sup> **16a**,<sup>5</sup> and **16b**,<sup>2,5</sup> were prepared using literature procedures. All other starting materials and reagents were used as supplied from commercial sources.

## 2. Procedures

### 2.1. Preparation of Cyclobutenediones

#### 3-(Dimethylamino)-4-methoxycyclobut-3-ene-1,2-dione, **9a**<sup>6</sup>

To a solution of dimethyl squarate **1a** (500 mg, 3.51 mmol) in methanol (80 mL) was added Me<sub>2</sub>NH•HCl (286 mg, 3.51 mmol) followed by triethylamine (0.49 mL, 3.51 mmol). After 2 h the solution was concentrated *in vacuo* to a yellow solid, then purified by column chromatography (60–80 % EtOAc/petrol) gave the title compound **9a** (496 mg, 3.19 mmol, 91 %) as a white solid, m.p. 142–143 °C (EtOAc/hexane); *v*<sub>max</sub> (film) 2941 (br), 2358 (br), 1801 (m), 1700 (s), 1609 (s), 1497 (s), 1417 (m), 1393 (s), 1277 (m), 1187 (m); δ<sub>H</sub> (400 MHz, CDCl<sub>3</sub>) 4.37 (s, 3H, CH<sub>3</sub>), 3.32 (s, 3H, CH<sub>3</sub>), 3.13 (s, 3H, CH<sub>3</sub>); δ<sub>C</sub> (100 MHz, CDCl<sub>3</sub>) 188.8 (C), 182.4 (C), 176.4 (C), 171.9 (C), 60.4 (CH<sub>3</sub>), 39.2 (CH<sub>3</sub>), 38.7 (CH<sub>3</sub>); LRMS (ESI<sup>+</sup>) 156 (100 %, [MH]<sup>+</sup>); HRMS (ESI<sup>+</sup>) C<sub>7</sub>H<sub>9</sub>NNaO<sub>3</sub> [M+Na]<sup>+</sup> calculated 178.0475, observed 178.0478.

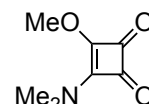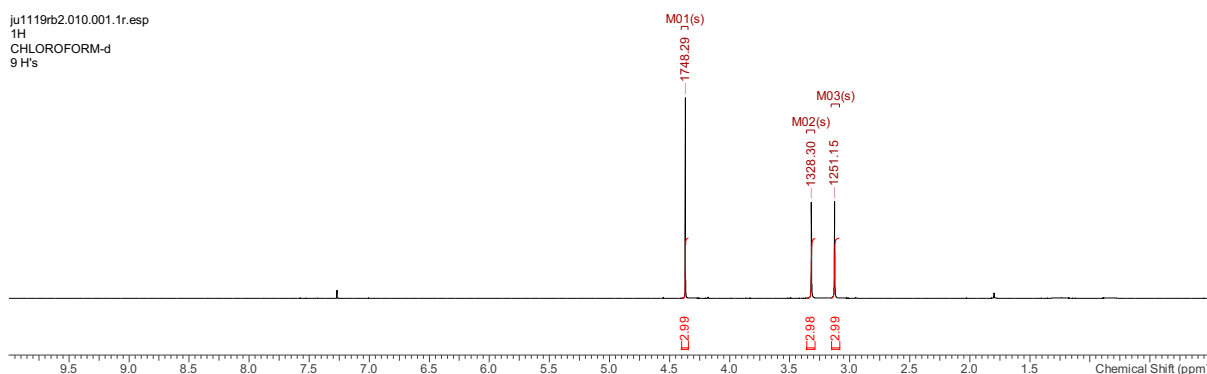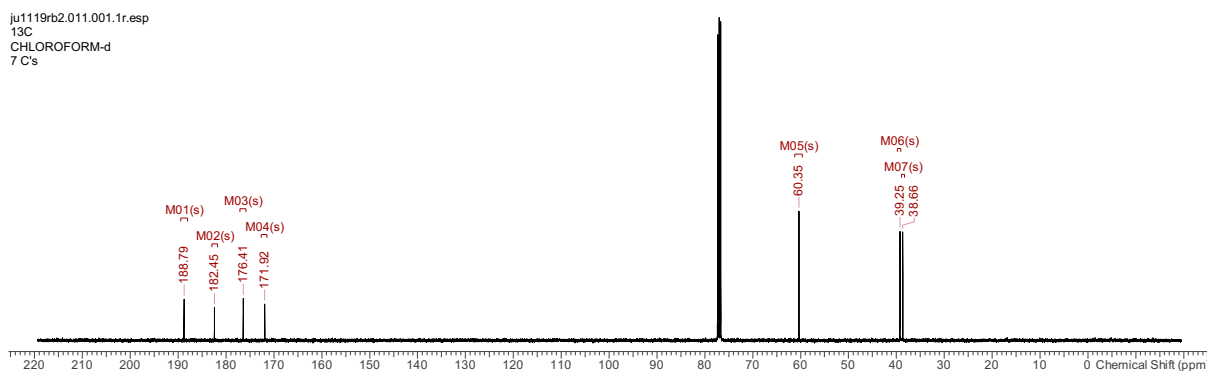

### 3-Methoxy-4-(pyrrolidin-1-yl)cyclobut-3-ene-1,2-dione, **9b**

To a solution of dimethyl squarate **1a** (500 mg, 3.51 mmol) in methanol (80 mL) was added pyrrolidine (0.29 mL, 3.51 mmol). After 3 h the solution was concentrated *in vacuo* to a yellow solid, then purified by column chromatography (60 % EtOAc/petrol) to give the title compound **9b** (540 mg, 2.98 mmol, 85 %) as a white solid, m.p. 139–141 °C (Et<sub>2</sub>O/petrol);  $\nu_{\max}$  (film) 2981 (br), 2885 (m), 2359 (br), 1792 (m), 1703 (s), 1649 (s), 1593 (w), 1489 (s), 1462 (s), 1405 (s);  $\delta_{\text{H}}$  (400 MHz, CDCl<sub>3</sub>) 4.36 (s, 3H, CH<sub>3</sub>), 3.88–3.75 (m, 2H, 2×NCHH), 3.65–3.53 (m, 2H, 2×NCHH), 2.01–1.93 (m, 4H, 2×CH<sub>2</sub>);  $\delta_{\text{C}}$  (100 MHz, CDCl<sub>3</sub>) 189.0 (C), 182.7 (C), 177.1 (C), 170.0 (C), 60.1 (CH<sub>3</sub>), 48.6 (CH<sub>2</sub>), 48.5 (CH<sub>2</sub>), 25.1 (CH<sub>2</sub>), 24.8 (CH<sub>2</sub>); LRMS (ESI<sup>+</sup>) 182 (100 %, [MH]<sup>+</sup>); HRMS (ESI<sup>+</sup>) C<sub>9</sub>H<sub>12</sub>NO<sub>3</sub> [MH]<sup>+</sup> calculated 182.0812, observed 182.0814.

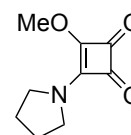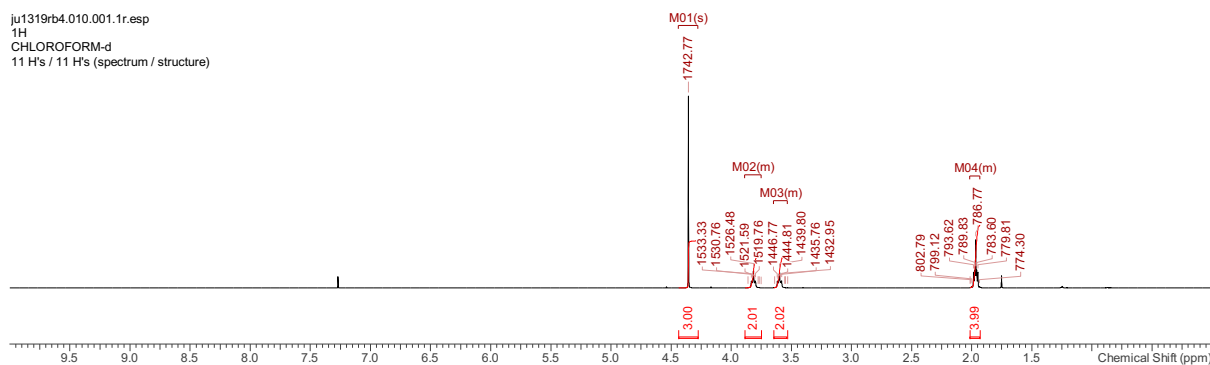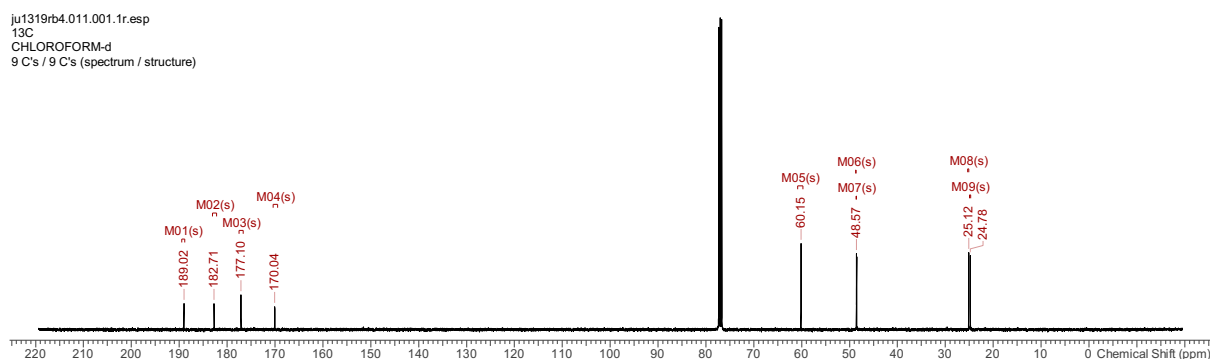

### 3-(*tert*-Butoxy)-4-(dimethylamino)cyclobut-3-ene-1,2-dione, **9c**

To a solution of di-*tert*-butyl squarate **1c** (679 mg, 3.00 mmol) in methanol (40 mL) was added Me<sub>2</sub>NH•HCl (245 mg, 3.00 mmol) followed by triethylamine (0.42 mL, 3.00 mmol). After 24 h the solution was concentrated *in vacuo* to a yellow solid, then purified by column chromatography (20–50 % EtOAc/petrol) to afford the title compound **9c** (496 mg, 3.19 mmol, 91 %) as a white solid, m.p. 129–130 °C (Et<sub>2</sub>O/hexane);  $\nu_{\max}$  (film) 2952 (w), 2924 (w), 2852 (w), 1772 (m), 1663 (s), 1557 (s), 1522 (s), 1461 (w), 1445 (m), 1412 (s);  $\delta_{\text{H}}$  (400 MHz, CDCl<sub>3</sub>) 3.34 (s, 3H, NCH<sub>3</sub>), 3.19 (s, 3H, NCH<sub>3</sub>), 1.60 (s, 9H, C(CH<sub>3</sub>)<sub>3</sub>);  $\delta_{\text{C}}$  (100 MHz, CDCl<sub>3</sub>) 189.5 (C), 180.9 (C), 176.3 (C), 173.4 (C), 85.3 (C), 39.0 (CH<sub>3</sub>), 38.8 (NCH<sub>3</sub>), 28.8 (CH<sub>3</sub>); LRMS (ESI<sup>+</sup>) 220 (100 %, [M+Na]<sup>+</sup>), 198 (45 %, [MH]<sup>+</sup>); HRMS (ESI<sup>+</sup>) C<sub>10</sub>H<sub>15</sub>NNaO<sub>3</sub> [M+Na]<sup>+</sup> calculated 220.0944, observed 220.0942; C<sub>10</sub>H<sub>16</sub>NO<sub>3</sub> [MH]<sup>+</sup> calculated 198.1125, observed 198.1122.

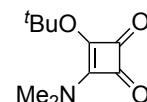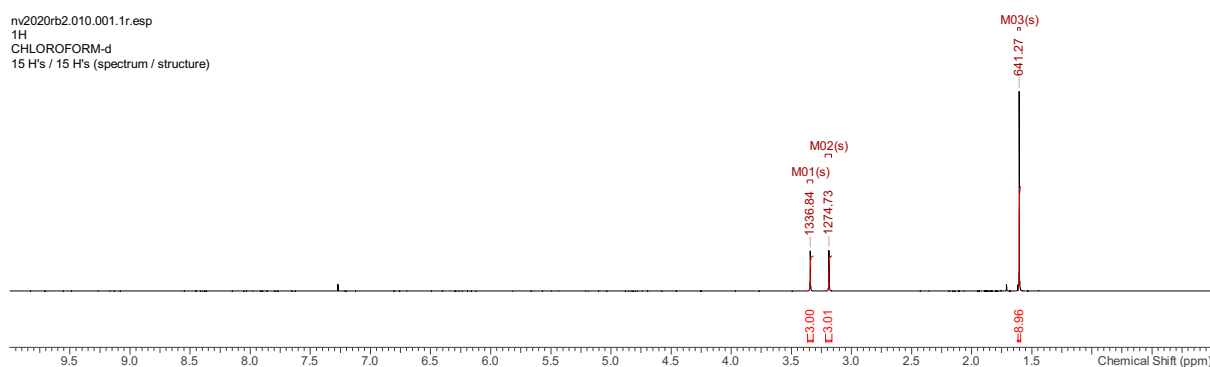

nv2020rb2.011.001.1r.esp  
13C  
CHLOROFORM-d  
10 C's / 10 C's (spectrum / structure)

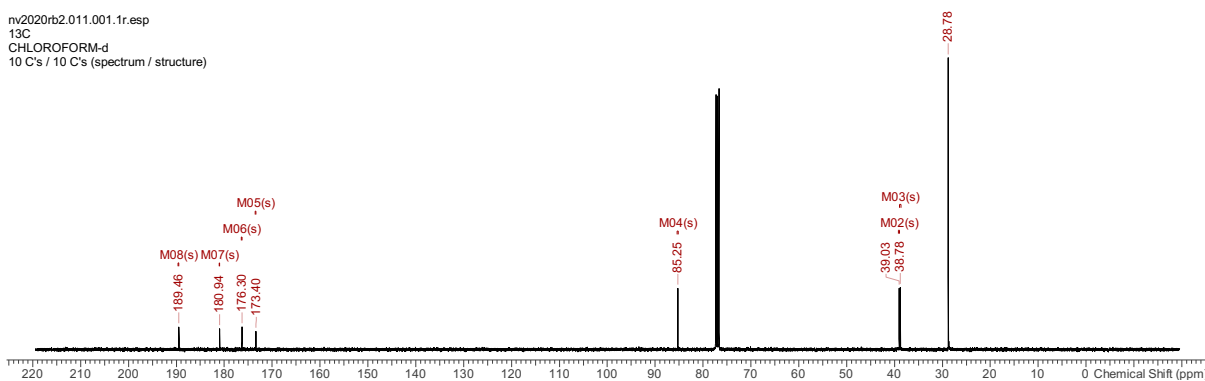

### 3-((3,5-Bis(trifluoromethyl)phenyl)(methyl)amino)-4-methoxycyclobut-3-ene-1,2-dione, 9d

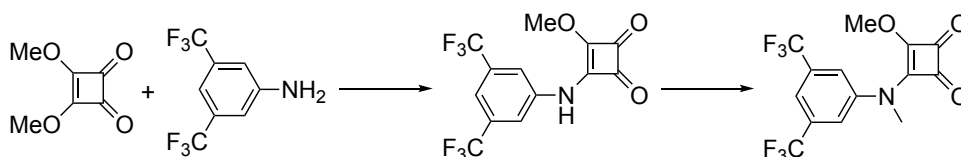

To a solution of dimethyl squarate **1a** (711 mg, 5.00 mmol) in methanol (25 mL) was added 3,5-bis(trifluoromethyl)aniline (0.78 mL, 5.00 mmol). After 48 h the solution was concentrated *in vacuo* and purified by column chromatography (20 % EtOAc/petrol) to give 3-((3,5-bis(trifluoromethyl)phenyl)amino)-4-methoxycyclobut-3-ene-1,2-dione (1.091 g, 3.21 mmol, 64 %) as a pale yellow solid, m.p. dec. 193 °C;  $\nu_{\max}$  (neat) 3101 (w), 2972 (br), 1796 (w), 1735 (w), 1698 (m), 1629 (w), 1586 (s), 1534 (m), 1473 (m), 1373 (s);  $\delta_{\text{H}}$  (400 MHz, DMSO- $d_6$ ) 11.19 (br s, 1H, NH), 8.02 (br s, 2H, 2 $\times$ ArH), 7.74 (br s, 1H, ArH), 4.40 (s, 3H, CH<sub>3</sub>);  $\delta_{\text{C}}$  (100 MHz, DMSO- $d_6$ ) 187.4 (C), 184.5 (C), 179.9 (C), 169.1 (C), 140.2 (C), 131.2 (q,  $J = 33.0$  Hz, 2 $\times$ CCF<sub>3</sub>), 123.1 (q,  $J = 272.9$  Hz, 2 $\times$ CF<sub>3</sub>), 119.2 (br d,  $J = 2.9$  Hz, 2 $\times$ CH), 116.2 (m, CH), 60.9 (CH<sub>3</sub>);  $\delta_{\text{F}}$  (376MHz, DMSO- $d_6$ )  $\delta - 61.96$  (s, 6F, 2 $\times$ CF<sub>3</sub>); LRMS (ESI<sup>+</sup>) 340 (100 %, [MH]<sup>+</sup>); HRMS (ESI<sup>+</sup>) C<sub>13</sub>H<sub>7</sub>F<sub>6</sub>NNaO<sub>3</sub> [M+Na]<sup>+</sup> calculated 362.0222, observed 362.0220, C<sub>13</sub>H<sub>8</sub>F<sub>6</sub>NO<sub>3</sub> [MH]<sup>+</sup> calculated 340.0403, observed 340.0399.

au1220rb2.010.001.1r.esp  
1H  
DMSO-d6  
7 H's / 7 H's (spectrum / structure)

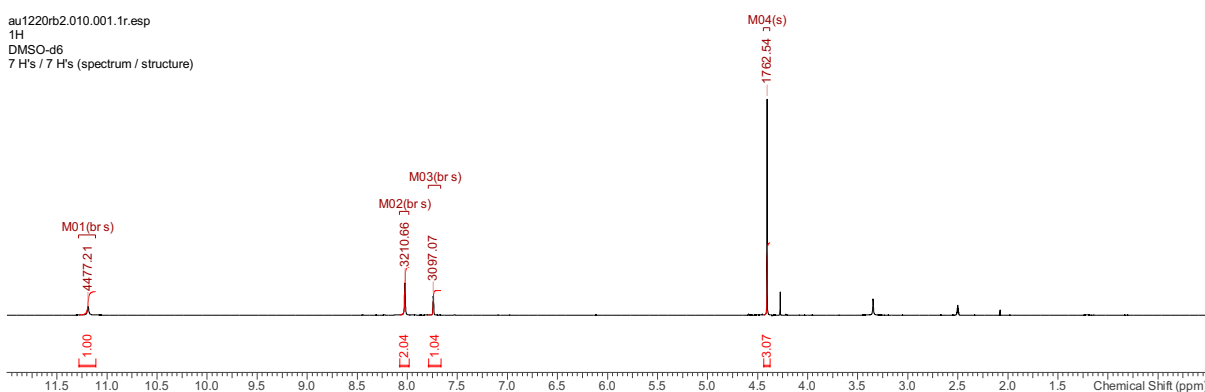

au1220rb2.013.001.1r.esp  
13C  
DMSO-d6  
13 C's / 13 C's (spectrum / structure)

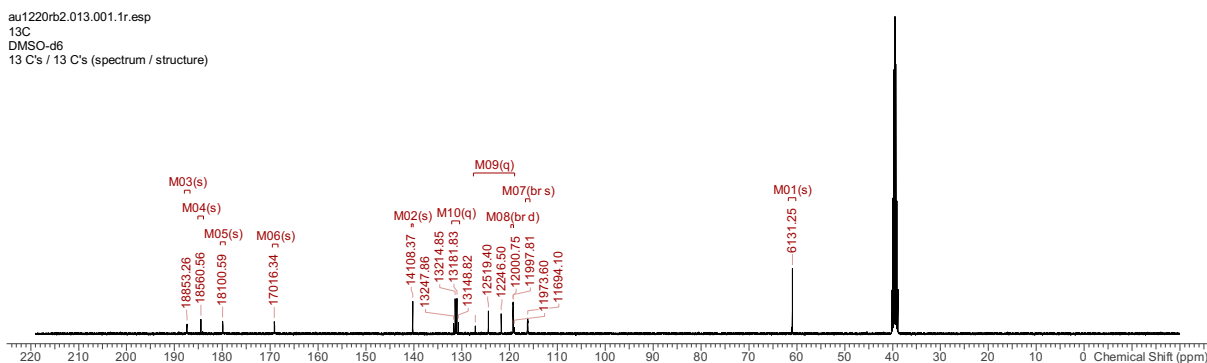

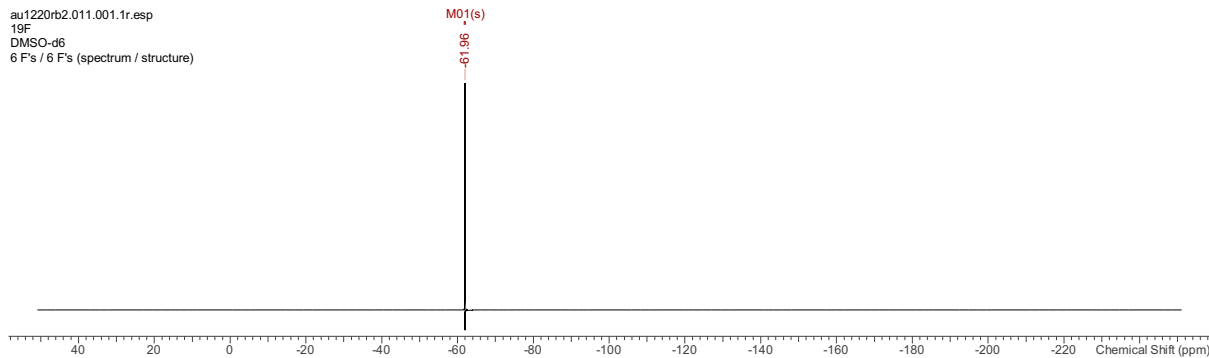

To a solution of bis(trifluoromethyl)phenylamino)-4-methoxycyclobut-3-ene-1,2-dione (1.02 g, 3.00 mmol) in DMF (15 mL) was added  $K_2CO_3$  (621 mg, 4.50 mmol) followed after 30 min by MeI (0.37 mL, 6.00 mmol). After 24 h, water (15 mL) was added then the aqueous phase was extracted with EtOAc (3×90 mL). The organic phases were combined, washed with water (3×270 mL), dried over  $MgSO_4$  and concentrated *in vacuo* to a yellow solid. Purification by column chromatography (15–20 % EtOAc/petrol) gave the title compound **9d** (880 mg, 2.49 mmol, 83 %) as a pale yellow solid, m.p. 95–96 °C;  $\nu_{max}$  (neat) 2988 (br), 2901 (br), 1796 (m), 1723 (m), 1572 (s), 1491 (s), 1460 (m), 1422 (w), 1392 (s), 1373 (s);  $\delta_H$  (400 MHz, DMSO- $d_6$ ) 7.76 (br s, 1H, ArH), 7.59 (br s, 2H, 2×ArH), 4.41 (s, 3H, OCH<sub>3</sub>), 3.80 (s, 3H, NCH<sub>3</sub>);  $\delta_C$  (100 MHz, DMSO- $d_6$ ) 187.4 (C), 184.9 (C), 178.8 (C), 170.3 (C), 142.3 (C), 132.5 (q,  $J = 33.8$  Hz, 2×CCF<sub>3</sub>), 122.7 (q,  $J = 237.1$  Hz, 2×CF<sub>3</sub>), 122.3 (br q,  $J = 2.9$  Hz, 2×CH), 119.7 (spt,  $J = 3.7$  Hz, CH), 61.0 (CH<sub>3</sub>), 38.5 (CH<sub>3</sub>); LRMS (ESI<sup>+</sup>) 354 (100 %, [MH]<sup>+</sup>); HRMS (ESI<sup>+</sup>) C<sub>14</sub>H<sub>9</sub>F<sub>6</sub>NNaO<sub>3</sub> [M+Na]<sup>+</sup> calculated 376.0379, observed 376.0381; C<sub>14</sub>H<sub>10</sub>F<sub>6</sub>NO<sub>3</sub> [MH]<sup>+</sup> calculated 354.0559, observed 354.0560.

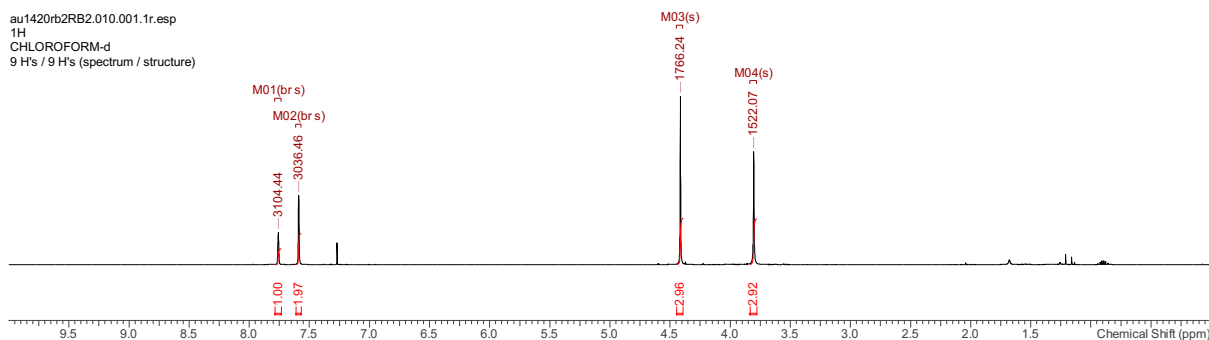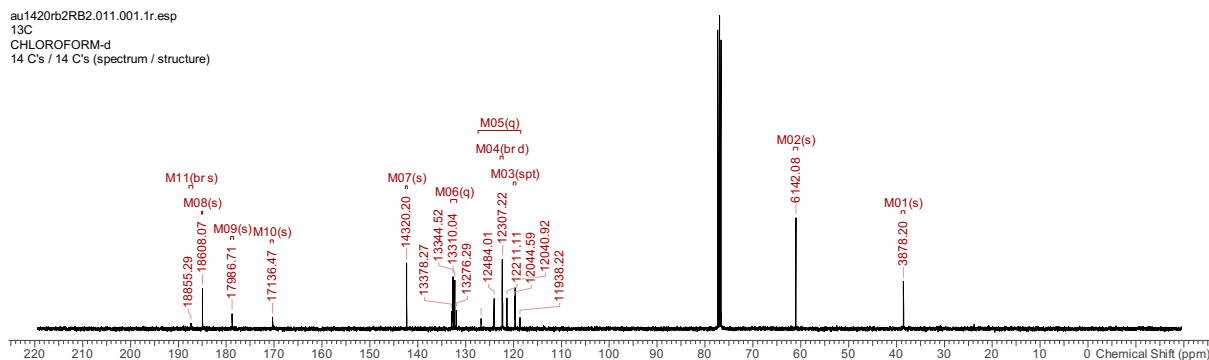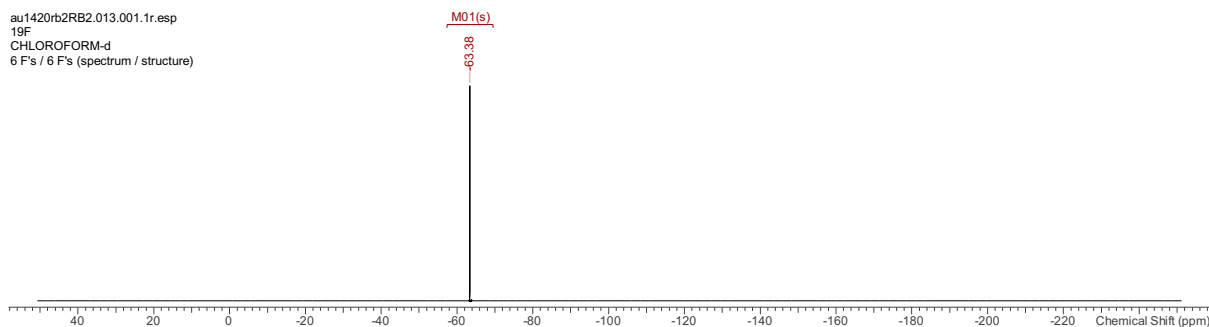

### 3-(*tert*-Butoxy)-4-(diethylamino)cyclobut-3-ene-1,2-dione, **9e**

To a solution of di-*tert*-butyl squarate **1c** (905 mg, 4.00 mmol) in methanol (70 mL) was added diethylamine (0.41 mL, 4.00 mmol). After 3 h the solution was concentrated *in vacuo*, then purified by column chromatography (10–20 % EtOAc/petrol) to give the title compound **9e** (799 mg, 3.54 mmol, 89 %) as an off-white solid, m.p. 61–63 °C (Et<sub>2</sub>O);  $\nu_{\max}$  (film) 2976 (m), 2360 (w), 1796 (m), 1704 (s), 1592 (s), 1426 (s), 1397 (w), 1371 (m), 1306 (s), 1270 (w);  $\delta_{\text{H}}$  (400 MHz, CDCl<sub>3</sub>) 3.68 (q,  $J = 7.2$  Hz, 2H, CH<sub>2</sub>), 3.45 (q,  $J = 7.2$  Hz, 2H, CH<sub>2</sub>), 1.55 (s, 9H, 3×CH<sub>3</sub>), 1.194 (t,  $J = 7.2$  Hz, 3H, CH<sub>3</sub>), 1.189 (t,  $J = 7.2$  Hz, 3H, CH<sub>3</sub>);  $\delta_{\text{C}}$  (100 MHz, CDCl<sub>3</sub>) 189.4 (C), 180.7 (C), 176.2 (C), 172.7 (C), 84.9 (C), 44.1 (CH<sub>2</sub>), 43.6 (CH<sub>2</sub>), 28.6 (3×CH<sub>3</sub>), 14.5 (CH<sub>3</sub>), 14.4 (CH<sub>3</sub>); LRMS (ESI<sup>+</sup>) 248 (73 %, [M+Na]<sup>+</sup>), 226 (4 %, [MH]<sup>+</sup>); HRMS (ESI<sup>+</sup>) C<sub>12</sub>H<sub>19</sub>NNaO<sub>3</sub> [M+Na]<sup>+</sup> calculated 248.1257, observed 248.1259, C<sub>12</sub>H<sub>20</sub>NO<sub>3</sub> [MH]<sup>+</sup> calculated 226.1438, observed 226.1441.

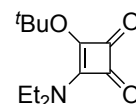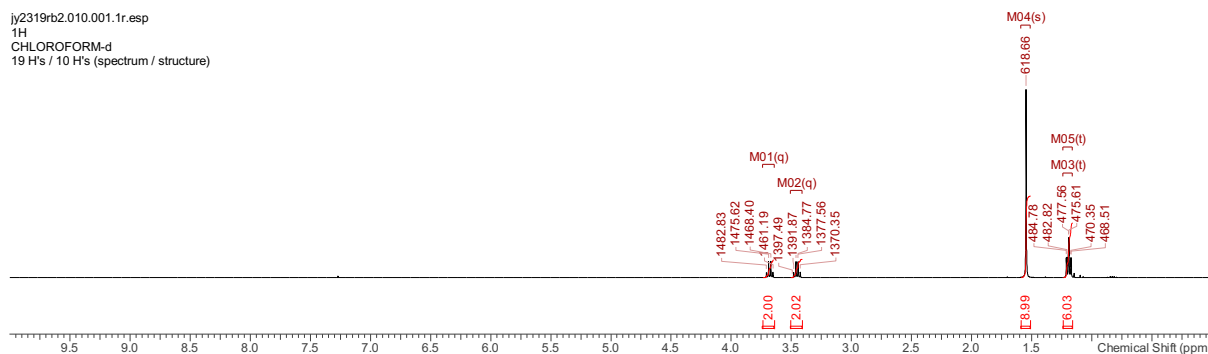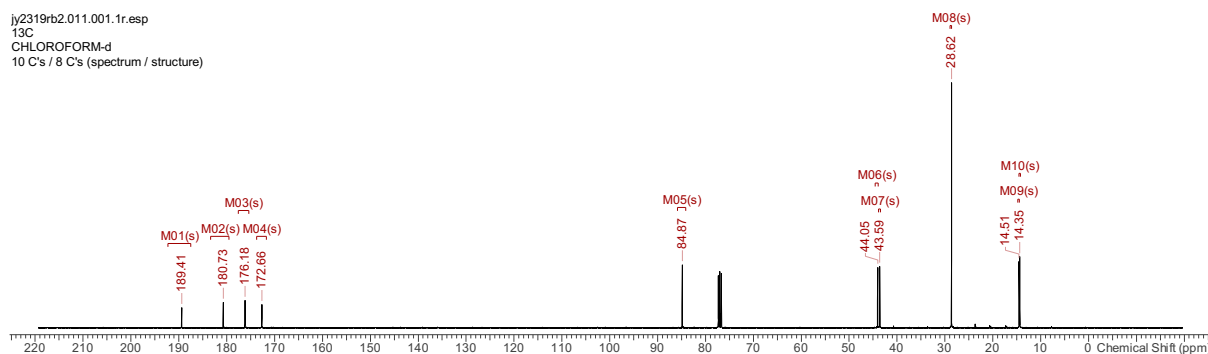

### 3-((4-Bromophenyl)(methyl)amino)-4-methoxycyclobut-3-ene-1,2-dione, **9f**

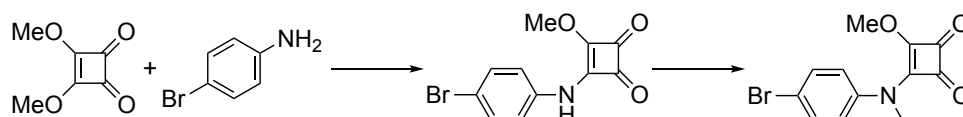

To a solution of dimethyl squarate **1a** (711 mg, 5.00 mmol) in methanol (25 mL) was added 4-bromoaniline (946 mg, 5.50 mmol). After 24 h the solution was concentrated *in vacuo* then purified by column chromatography (40–100 % EtOAc/petrol) to give 3-((4-bromophenyl)amino)-4-methoxycyclobut-3-ene-1,2-dione (1.12 g, 3.97 mmol, 79 %) as an off-white solid, m.p. 233 °C (dec.);  $\nu_{\max}$  (neat) 3243 (w), 3190 (w), 3095 (w), 2988 (br), 1794 (m), 1703 (m), 1609 (s), 1566 (s), 1511 (s), 1494 (m);  $\delta_{\text{H}}$  (400 MHz, DMSO-*d*<sub>6</sub>) 10.81 (br s, 1H, NH), 7.56–7.50 (m, 2H, 2×ArH), 7.31 (br d,  $J = 8.6$  Hz, 2H, 2×ArH), 4.38 (s, 3H, CH<sub>3</sub>);  $\delta_{\text{C}}$  (100 MHz, DMSO-*d*<sub>6</sub>) 184.0 (C), 179.0 (C), 178.9 (C), 169.0 (C), 137.4 (C), 131.9 (2×CH), 121.5 (2×CH), 116.1 (C), 60.6 (CH<sub>3</sub>); LRMS (ESI<sup>+</sup>) 284 (54 %, [M<sup>81</sup>Br]H<sup>+</sup>), 282 (66 %, [M<sup>79</sup>Br]H<sup>+</sup>); HRMS (ESI<sup>+</sup>) C<sub>11</sub>H<sub>9</sub><sup>79</sup>BrNO<sub>3</sub> [MH]<sup>+</sup> calculated 281.9760, observed 281.9755.

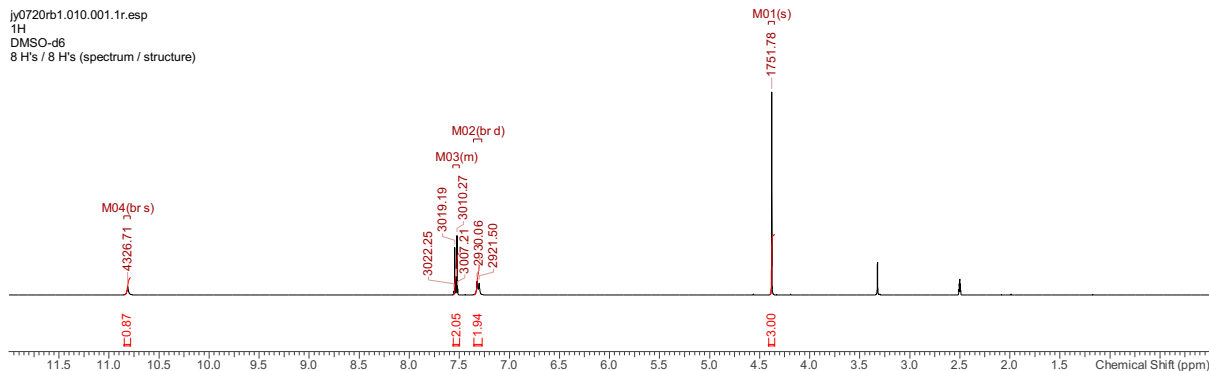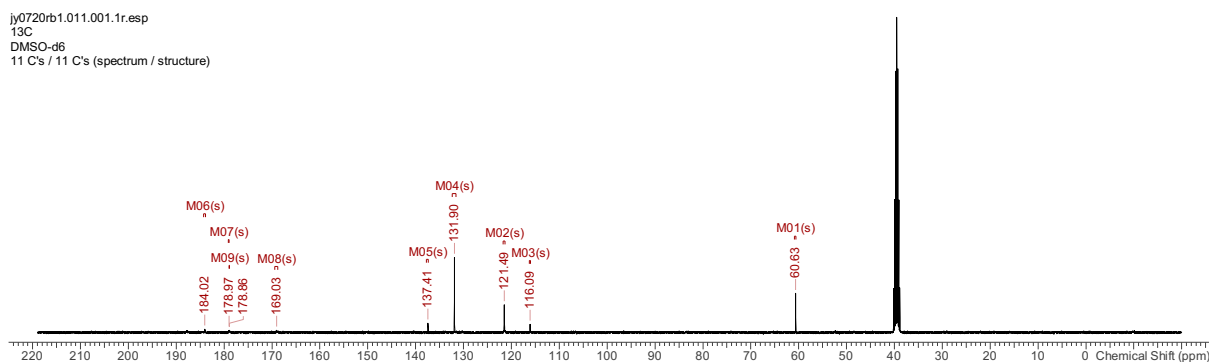

To a solution of 3-((4-bromophenyl)amino)-4-methoxycyclobut-3-ene-1,2-dione (846 mg, 3.00 mmol) in DMF (15 mL) was added  $K_2CO_3$  (621 mg, 4.50 mmol), followed after 30 min by MeI (0.37 mL, 6.00 mmol). After 24 h, water (15 mL) was added then the aqueous phase was separated and extracted with EtOAc (3×90 mL). The organic phases were combined, washed with water (3×270 mL), dried over  $MgSO_4$  and concentrated *in vacuo* to an orange solid. Trituration with diethyl ether gave the title compound **9f** (713 mg, 2.41 mmol, 80 %) as a pale yellow powder, m.p. 201–202 °C (DCM/hexane);  $\nu_{max}$  (neat) 2970 (br), 2360 (w), 1796 (s), 1712 (s), 1591 (s), 1570 (s), 1473 (s), 1427 (m), 1406 (m), 1362 (s);  $\delta_H$  (400 MHz, DMSO- $d_6$ ) 7.66–7.55 (m, 2H, 2×ArH), 7.35–7.24 (m, 2H, 2×ArH), 4.29 (s, 3H, OCH<sub>3</sub>), 3.60 (s, 3H, NCH<sub>3</sub>);  $\delta_C$  (100 MHz, DMSO- $d_6$ ) 184.0 (C), 178.2 (C), 170.2 (C), 140.7 (C), 131.5 (2×CH), 125.2 (2×CH), 118.9 (C), 60.6 (OCH<sub>3</sub>), 38.7 (NCH<sub>3</sub>) one C coincident or not observed; LRMS (ESI<sup>+</sup>) 298 (90 %, [M{<sup>81</sup>Br}H]<sup>+</sup>) 296 (100 %, [M{<sup>79</sup>Br}H]<sup>+</sup>); HRMS (ESI<sup>+</sup>) C<sub>12</sub>H<sub>10</sub>BrNNO<sub>3</sub> [M+Na]<sup>+</sup> calculated 317.9736, observed 317.9734, C<sub>12</sub>H<sub>11</sub>BrNO<sub>3</sub> [MH]<sup>+</sup> calculated 295.9917, observed 295.9914.

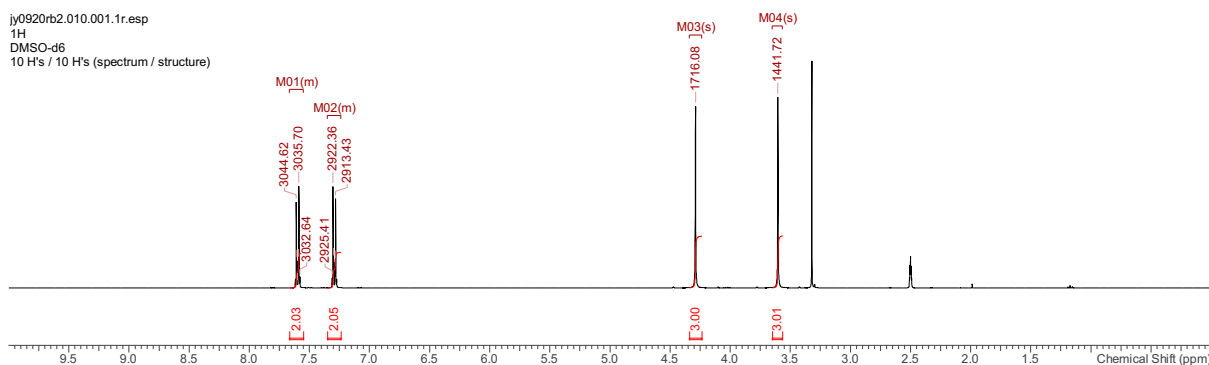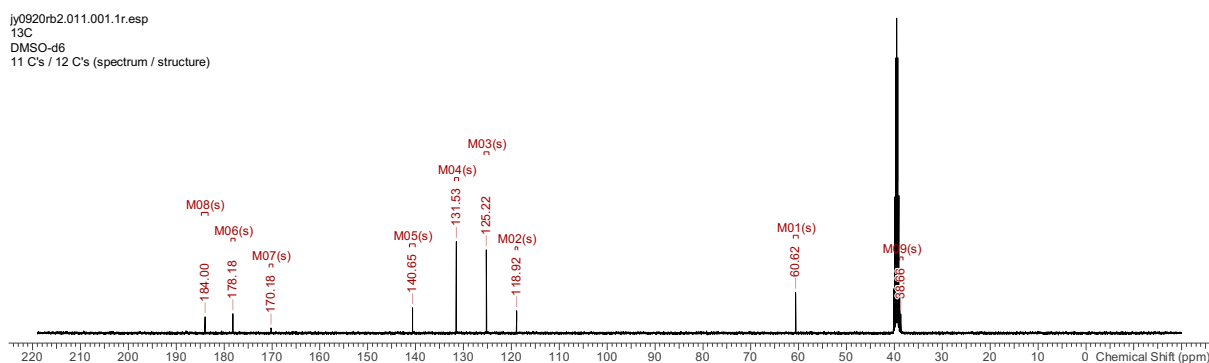

### 3-Isopropylcyclobut-3-ene-1,2-dione, **25**<sup>7</sup>

To a solution of diisopropyl squarate **1b** (4.99 g, 25.2 mmol) in THF (300 mL) at  $-20\text{ }^{\circ}\text{C}$  was added  $\text{LiAl}(\text{O}^t\text{Bu})_3\text{H}$  (8.01 g, 31.5 mmol). After 1 h the solution was warmed to RT then after a further 165 min sat. rochelle salt (90 mL) was added. After 30 min, the aqueous phase was separated and extracted with  $\text{CHCl}_3$  ( $3\times 100\text{ mL}$ ). The organic phases were combined, dried over  $\text{MgSO}_4$ , filtered and concentrated *in vacuo* to a pale yellow oil. DCM (150 mL) was added, then the resulting solution was cooled to  $0\text{ }^{\circ}\text{C}$  and TFAA (4.20 mL, 30.2 mmol) added. After a further 30 min the reaction was warmed to RT for 16 h then sat.  $\text{NH}_4\text{Cl}$  (50 mL) was added. The aqueous phase was separated and extracted with DCM ( $3\times 30\text{ mL}$ ) then the organic phases were combined, dried over  $\text{MgSO}_4$ , filtered and concentrated *in vacuo*. Purification by column chromatography (10–20% EtOAc/cyclohexane) gave the title compound **25** (2.65 g, 18.9 mmol, 75%) as an orange oil,  $\nu_{\text{max}}$  (film) 3102 (w), 2986 (w), 2938 (w), 1793 (s), 1763 (s), 1557 (s), 1466 (w), 1380 (m), 1298 (m), 1280 (s), 1198 (w), 1144 (w), 1063 (s);  $\delta_{\text{H}}$  (400 MHz,  $\text{CDCl}_3$ ) 8.48 (s, 1H, =CH), 5.01 (spt,  $J = 6.2\text{ Hz}$ , 1H, CHCH<sub>3</sub>), 1.49 (d,  $J = 6.1\text{ Hz}$ , 6H,  $2\times\text{CH}_3$ );  $\delta_{\text{C}}$  (100 MHz,  $\text{CDCl}_3$ ) 200.4 (C), 195.4 (C), 192.9 (C), 163.7 (CH), 80.9 (CH), 21.9 ( $2\times\text{CH}_3$ ); LRMS (ESI<sup>+</sup>) 163 (8%,  $[\text{M}+\text{Na}]^+$ ), 141 (32%,  $[\text{MH}]^+$ ). These data are consistent with literature values.<sup>5</sup>

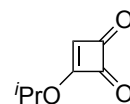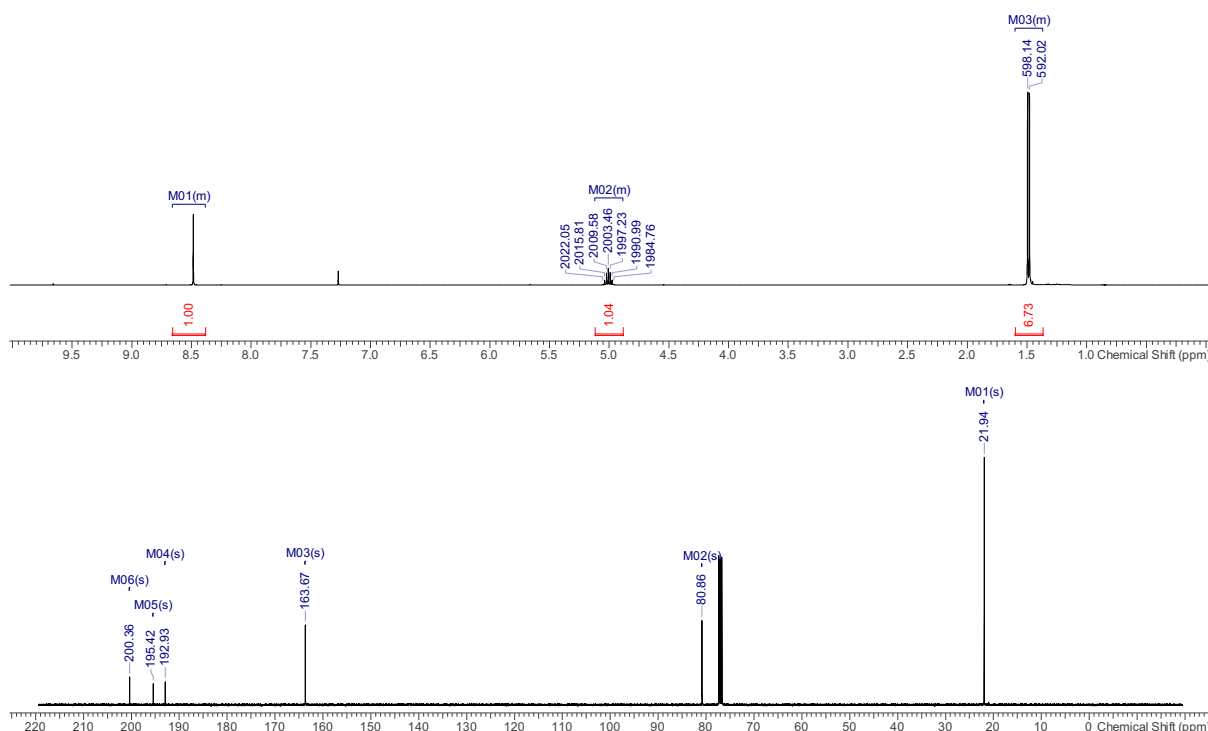

## 2.2. Reactions of Cyclobutenediones with Lithium Amides

### (Z)-3,4-Dimethoxy-N,N-diisopropyl-2-oxobut-3-enamide, **7a**

To a solution of DIPA (0.29 mL, 2.10 mmol) in THF (20 mL) at  $0\text{ }^{\circ}\text{C}$  was added  $n\text{BuLi}$  (2.5 M in hexane, 0.84 mL, 2.10 mmol) dropwise. After 15 min the solution was added *via* cannula to a solution of dimethyl squarate **1a** (284 mg, 2.00 mmol) in THF (50 mL) at  $-78\text{ }^{\circ}\text{C}$ . After a further 2 h  $\text{H}_2\text{O}$  (20 mL) was added, and the solution was warmed to RT. The aqueous phase was separated and extracted with DCM ( $2\times 50\text{ mL}$ ) then the organic phases were combined, dried over  $\text{MgSO}_4$  and concentrated *in vacuo*. Purification by column chromatography (30–80% EtOAc/petrol) gave the title compound **7a** (326 mg, 1.34 mmol, 65%) as a yellow oil,  $\nu_{\text{max}}$  (film) 2974 (br), 1636 (s), 1446 (m), 1371 (m), 1239 (m), 1210 (m), 1139 (m), 1033 (m);  $\delta_{\text{H}}$  (400 MHz,  $\text{CDCl}_3$ ) 6.86 (1 H, s, =CH), 3.89 (3 H, s,  $\text{OCH}_3$ ), 3.73 (3 H, s,  $\text{OCH}_3$ ), 3.68 (1 H, dt,  $J = 13.3, 6.6\text{ Hz}$ ,  $\text{NCH}(\text{CH}_3)_2$ ), 3.46 (1 H, dt,  $J = 13.7, 6.9\text{ Hz}$ ,  $\text{NCH}(\text{CH}_3)_2$ ), 1.44 (6 H, d,  $J = 6.9\text{ Hz}$ ,  $\text{NCH}(\text{CH}_3)_2$ ), 1.16 (6 H, d,  $J = 6.7\text{ Hz}$ ,  $\text{NCH}(\text{CH}_3)_2$ );  $\delta_{\text{C}}$  (100 MHz,  $\text{CDCl}_3$ ) 188.4 (C), 166.5 (C), 153.4 (C), 136.9 (CH), 62.5 ( $\text{CH}_3$ ), 60.2 ( $\text{CH}_3$ ), 50.1 (CH), 45.7 (CH), 20.4 ( $2\times\text{CH}_3$ ), 20.0 ( $2\times\text{CH}_3$ ); LRMS (ESI<sup>+</sup>) 244 ( $[\text{MH}]^+$ , 100%), 266 ( $[\text{M}+\text{Na}]^+$ , 30%); HRMS (ESI<sup>+</sup>)  $\text{C}_{12}\text{H}_{22}\text{NO}_4$   $[\text{MH}]^+$  calculated 244.1543, observed 244.1544.

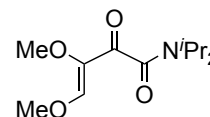

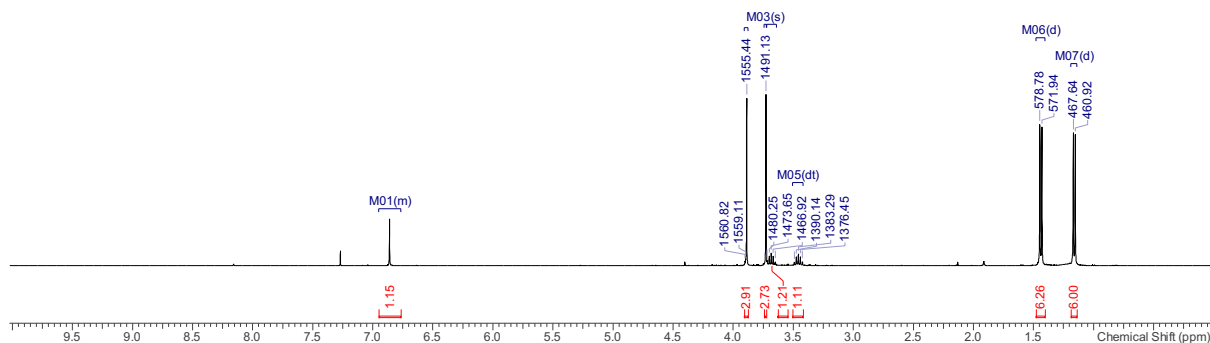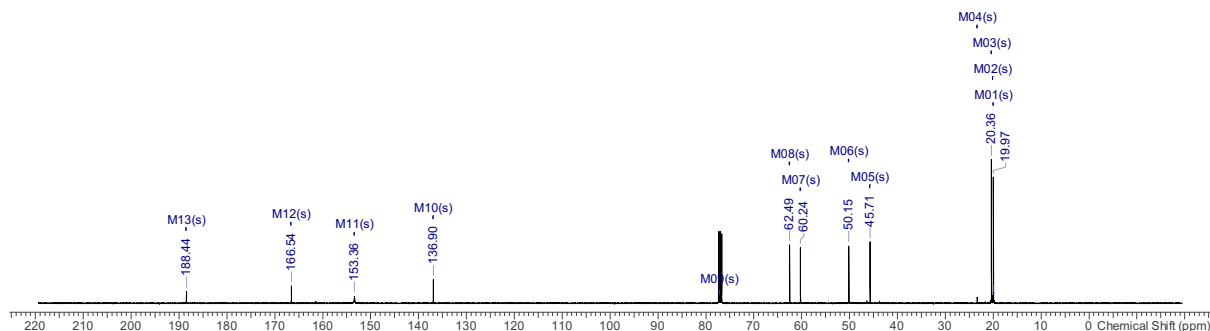

### (Z)-3,4-Diisopropoxy-N,N-diisopropyl-2-oxobut-3-enamide, **7b**

To a solution of cyclobutenedione **1b** (198 mg, 1.00 mmol) in THF (40 mL) at  $-78\text{ }^{\circ}\text{C}$  was added LDA (1.0 M in THF/hexanes, 1.05 mL, 1.05 mmol). After 8 h, water (20 mL) was added, and the solution was warmed to RT. The aqueous phase was separated and extracted with DCM (3 $\times$ 30 mL) then the organic phases were combined, dried over  $\text{MgSO}_4$  and concentrated *in vacuo*. Purification by column chromatography (20 % EtOAc/petrol) gave the title compound **7b** (182 mg, 0.61 mmol, 61 %) as a yellow oil,  $\nu_{\text{max}}$  (film) 2975 (s), 2935 (w), 1619 (s), 1448 (m), 1372 (m), 1347 (m), 1212 (s), 1138 (m), 1098 (s), 1056 (w);  $\delta_{\text{H}}$  (400 MHz,  $\text{CDCl}_3$ ) 7.05 (s, 1H, =CH), 4.32 (spt,  $J = 6.2$  Hz, 1H, OCH), 4.20 (spt,  $J = 6.2$  Hz, 1H, OCH), 3.73 (spt,  $J = 6.8$  Hz, 1H,  $\text{CH}(\text{CH}_3)_2$ ), 3.46 (spt,  $J = 6.8$  Hz, 1H,  $\text{CH}(\text{CH}_3)_2$ ), 1.47 (d,  $J = 6.8$  Hz, 6H,  $\text{CH}(\text{CH}_3)_2$ ), 1.33 (d,  $J = 6.2$  Hz, 6H,  $\text{CH}(\text{CH}_3)_2$ ), 1.24 (d,  $J = 6.2$  Hz, 6H,  $\text{CH}(\text{CH}_3)_2$ ), 1.17 (d,  $J = 6.8$  Hz, 6H,  $\text{CH}(\text{CH}_3)_2$ );  $\delta_{\text{C}}$  (100 MHz,  $\text{CDCl}_3$ ) 189.3 (C), 167.1 (C), 152.3 (CH), 134.6 (C), 78.8 (CH), 74.4 (CH), 50.2 (CH), 45.7 (CH), 22.3 ( $2\times\text{CH}_3$ ), 22.3 ( $2\times\text{CH}_3$ ), 20.4 ( $2\times\text{CH}_3$ ), 20.0 ( $2\times\text{CH}_3$ ); LRMS (ESI $^+$ ) 322 (38 %,  $[\text{M}+\text{Na}]^+$ ), 300 (100 %,  $[\text{MH}]^+$ ); HRMS (ESI $^+$ )  $\text{C}_{16}\text{H}_{29}\text{NNaO}_4$   $[\text{M}+\text{Na}]^+$  calculated 322.1989, observed 322.1991;  $\text{C}_{16}\text{H}_{30}\text{NO}_4$   $[\text{MH}]^+$  calculated 300.2169, observed 300.2165.

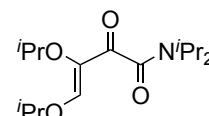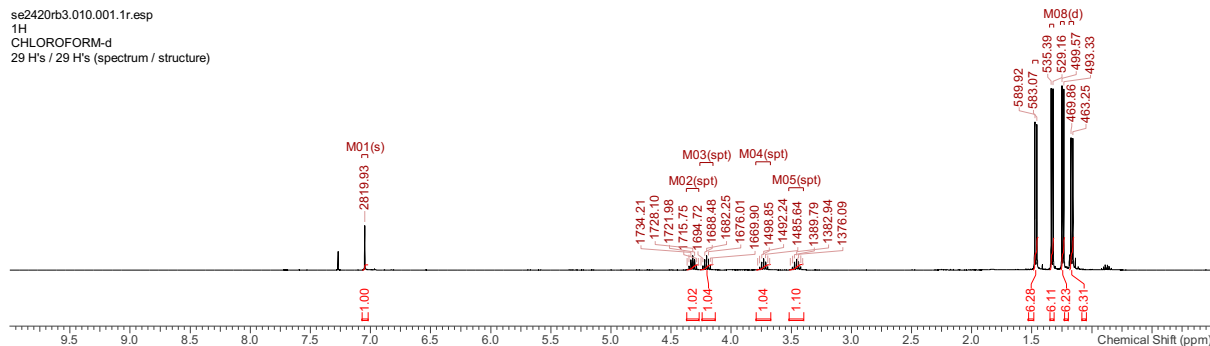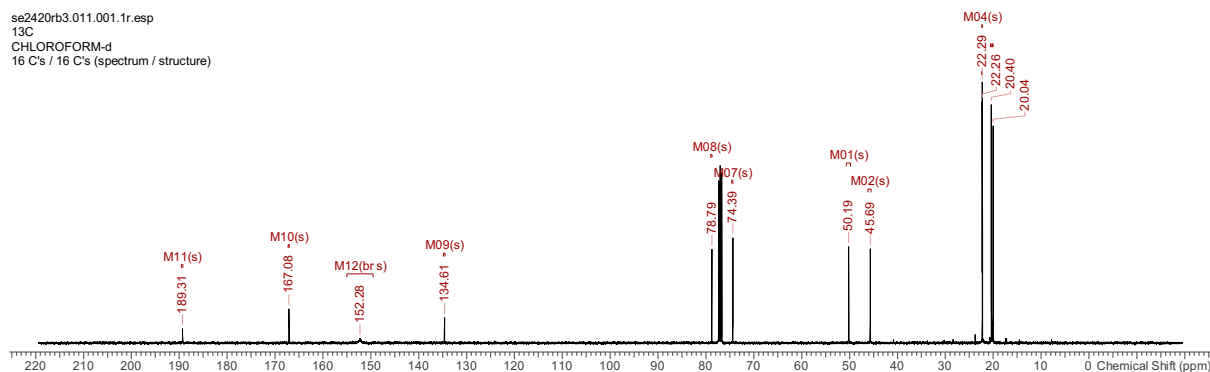



### (Z)-3,4-Di-tert-butoxy-N,N-diisopropyl-2-oxobut-3-enamide, **7c**

To a solution of cyclobutenedione **1c** (226 mg, 1.00 mmol) in THF (40 mL) at  $-78\text{ }^{\circ}\text{C}$  was added LDA (1.0 M in THF/hexanes, 1.05 mL, 1.05 mmol). After 8 h, water (20 mL) was added, and the solution was warmed to RT. The aqueous phase was separated and extracted with DCM (3 $\times$ 30 mL) then the organic phases were combined, dried over  $\text{MgSO}_4$  and concentrated *in vacuo*. Purification by column chromatography (10–20 % EtOAc/petrol) gave the title compound **7c** (184 mg, 0.56 mmol, 56 %) as a yellow oil,  $\nu_{\text{max}}$  (film) 2975 (br), 2936 (w), 1665 (w), 1613 (s), 1448 (m), 1370 (m), 1349 (w), 1269 (w), 1231 (m), 1216 (w);  $\delta_{\text{H}}$  (400 MHz,  $\text{CDCl}_3$ ) 7.30 (s, 1H, =CH), 3.76 (spt,  $J = 6.6$  Hz, 1H, CH( $\text{CH}_3$ ) $_2$ ), 3.46 (spt,  $J = 6.8$  Hz, 1H, CH( $\text{CH}_3$ ) $_2$ ), 1.49 (d,  $J = 6.8$  Hz, 6H, CH( $\text{CH}_3$ ) $_2$ ), 1.38 (s, 9H, C( $\text{CH}_3$ ) $_3$ ), 1.33 (s, 9H, C( $\text{CH}_3$ ) $_3$ ), 1.15 (d,  $J = 6.6$  Hz, 6H, CH( $\text{CH}_3$ ) $_2$ );  $\delta_{\text{C}}$  (100 MHz,  $\text{CDCl}_3$ ) 190.3 (C), 167.8 (C), 152.5 (br, CH), 133.3 (C), 81.4 (C), 81.2 (C), 50.2 (CH), 45.7 (CH), 28.7 (3 $\times$ CH $_3$ ), 28.0 (3 $\times$ CH $_3$ ), 20.4 (2 $\times$ CH $_3$ ), 20.1 (2 $\times$ CH $_3$ ); LRMS (ESI $^+$ ) 350 (32 %, [M+Na] $^+$ ), 328 (100 %, [MH] $^+$ ); HRMS (ESI $^+$ )  $\text{C}_{18}\text{H}_{33}\text{NNaO}_4$  [M+Na] $^+$  calculated 350.2302, observed 350.2311;  $\text{C}_{18}\text{H}_{34}\text{NO}_4$  [MH] $^+$  calculated 328.2482, observed 328.2487.

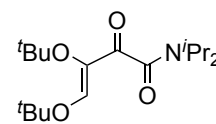

se2320rb3.010.001.1r.esp  
1H  
CHLOROFORM-d  
33 H's / 33 H's (spectrum / structure)

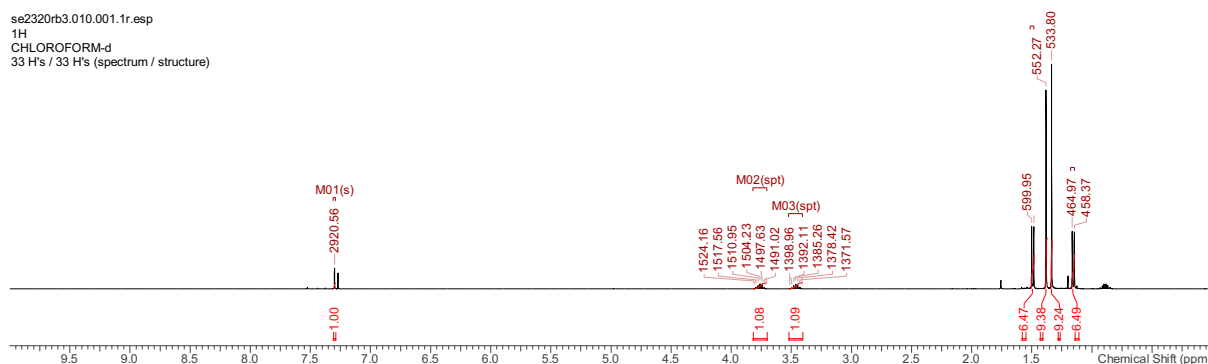

se2320rb3.011.001.1r.esp  
13C  
CHLOROFORM-d  
18 C's / 18 C's (spectrum / structure)

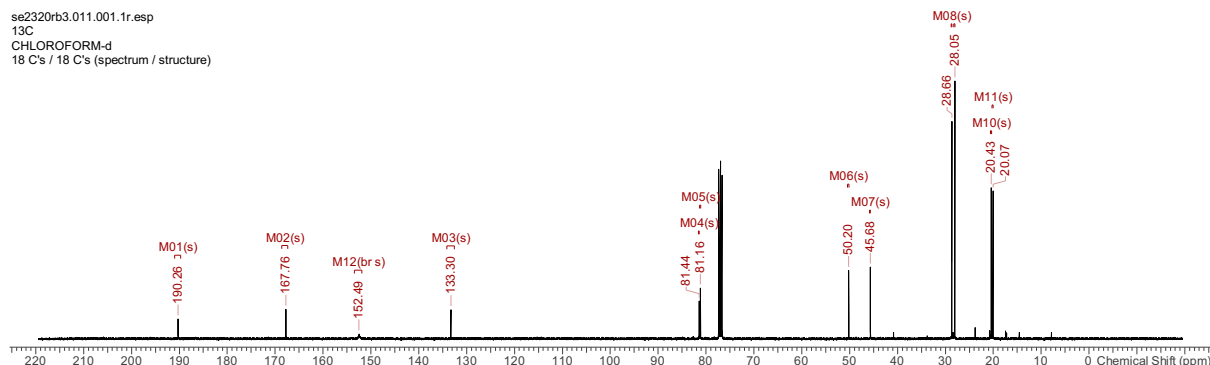

### (Z)-4-(Dimethylamino)-N,N-diisopropyl-3-methoxy-2-oxobut-3-enamide, **11a**

To a solution of cyclobutenedione **9a** (155 mg, 1.00 mmol) in THF (40 mL) at  $-78\text{ }^{\circ}\text{C}$  was added LDA (2.0 M in THF/ethylbenzene/hexanes, 0.53 mL, 1.05 mmol). After 90 min, water (10 mL) was added and the reaction mixture was warmed to RT. The aqueous phase separated and extracted with DCM (3 $\times$ 30 mL) then the organic phases were combined, dried over  $\text{MgSO}_4$  and concentrated *in vacuo*. Purification by column chromatography (50–80 % EtOAc/petrol) gave the title compound **11a** (173 mg, 0.67 mmol, 67 %) as a yellow oil,  $\nu_{\text{max}}$  (film) 3482 (br), 2970 (m), 2932 (br), 2359 (br), 1654 (w), 1629 (m), 1560 (s), 1445 (m), 1421 (m), 1404 (m);  $\delta_{\text{H}}$  (400 MHz,  $\text{CDCl}_3$ ) 6.50 (s, 1H, =CH), 3.88 (spt,  $J = 6.7$  Hz, 1H, CH( $\text{CH}_3$ ) $_2$ ), 3.66 (s, 3H, OCH $_3$ ), 3.43 (spt,  $J = 6.8$  Hz, 1H, CH( $\text{CH}_3$ ) $_2$ ), 3.11 (s, 6H, N(CH $_3$ ) $_2$ ), 1.46 (d,  $J = 6.8$  Hz, 6H, CH( $\text{CH}_3$ ) $_2$ ), 1.16 (d,  $J = 6.6$  Hz, 6H, CH( $\text{CH}_3$ ) $_2$ );  $\delta_{\text{C}}$  (100 MHz,  $\text{CDCl}_3$ ) 185.9 (C), 168.2 (C), 145.7 (CH), 131.1 (C), 60.5 (CH $_3$ ), 50.3 (CH), 45.5 (CH), 42.5 (br s, 2 $\times$ CH $_3$ ), 20.5 (2 $\times$ CH $_3$ ), 20.1 (2 $\times$ CH $_3$ ); LRMS (ESI $^+$ ) 257 (100 %, [MH] $^+$ ); HRMS (ESI $^+$ )  $\text{C}_{13}\text{H}_{24}\text{N}_2\text{NaO}_3$  [M+Na] $^+$  calculated 279.1679, observed 279.1679;  $\text{C}_{13}\text{H}_{25}\text{N}_2\text{O}_3$  [MH] $^+$  calculated 257.1860, observed 257.1862.

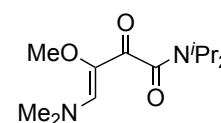

ju1419rb2.010.001.1r.esp  
1H  
CHLOROFORM-d  
24 H's

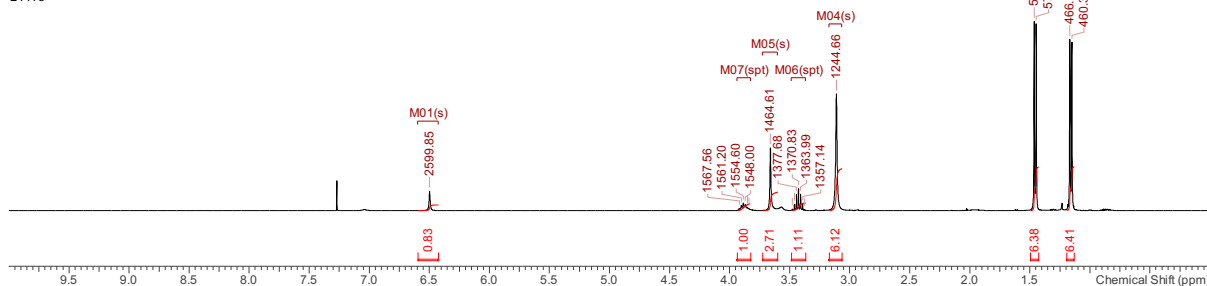

ju1419rb2.021.001.1r.esp  
13C  
CHLOROFORM-d  
13 C's / 13 C's (spectrum / structure)

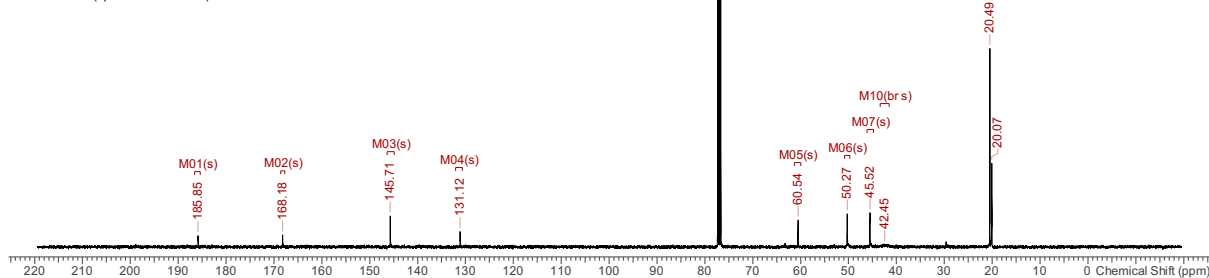

### (Z)-N,N-Diisopropyl-3-methoxy-2-oxo-4-(pyrrolidin-1-yl)but-3-enamide, **11b**

To a solution of cyclobutenedione **9b** (181 mg, 1.00 mmol) in THF (40 mL) at  $-78\text{ }^{\circ}\text{C}$  was added LDA (2.0M in THF/ethylbenzene/hexanes, 0.53 mL, 1.05 mmol) followed by water (10 mL) after 90 min. The solution was warmed to RT and the aqueous phase separated and extracted with DCM (3 $\times$ 30 mL). The organic phases were combined, dried over  $\text{MgSO}_4$  and concentrated *in vacuo* to a yellow oil. Purification by column chromatography (50–80 % ethyl acetate/petroleum ether) afforded the title compound (183 mg, 0.65 mmol, 65 %) as a yellow oil;  $\nu_{\text{max}}$  (film) 3481 (br), 2970 (m), 2875 (br), 2359 (br), 1629 (s), 1565 (s), 1443 (m), 1410 (m), 1365 (m), 1340 (w);  $\delta_{\text{H}}$  (400 MHz,  $\text{CDCl}_3$ ) 6.76 (s, 1H, =CH), 3.89 (spt,  $J = 6.6$  Hz, 1H, CH( $\text{CH}_3$ ) $_2$ ), 3.65 (s, 3H,  $\text{OCH}_3$ ), 3.55 (br s, 4H, 2 $\times$ NCH $_2$ ), 3.41 (spt,  $J = 6.8$  Hz, 1H, CH( $\text{CH}_3$ ) $_2$ ), 1.89 (br s, 4H, 2 $\times$ NCH $_2$ CH $_2$ ), 1.44 (d,  $J = 6.8$  Hz, 6H, CH( $\text{CH}_3$ ) $_2$ ), 1.14 (d,  $J = 6.6$  Hz, 6H, CH( $\text{CH}_3$ ) $_2$ );  $\delta_{\text{C}}$  (100 MHz,  $\text{CDCl}_3$ ) 185.3 (C), 168.3 (C), 142.6 (CH), 131.4 (C), 61.0 (OCH $_3$ ), 54.1 (br, 2 $\times$ CH $_2$ ), 50.2 (CH( $\text{CH}_3$ ) $_2$ ), 45.5 (CH( $\text{CH}_3$ ) $_2$ ), 25.1 (br, 2 $\times$ CH $_2$ ), 20.5 (CH( $\text{CH}_3$ ) $_2$ ), 20.0 (CH( $\text{CH}_3$ ) $_2$ ); LRMS (ESI $^+$ ) 283 (100 %, [MH] $^+$ ); HRMS (ESI $^+$ )  $\text{C}_{15}\text{H}_{27}\text{N}_2\text{O}_3$  [MH] $^+$  calculated 283.2016, observed 283.2020.

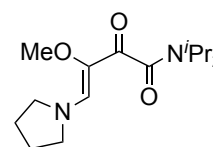

ju2519rb2.010.001.1r.esp  
1H  
CHLOROFORM-d  
26 H's / 26 H's (spectrum / structure)

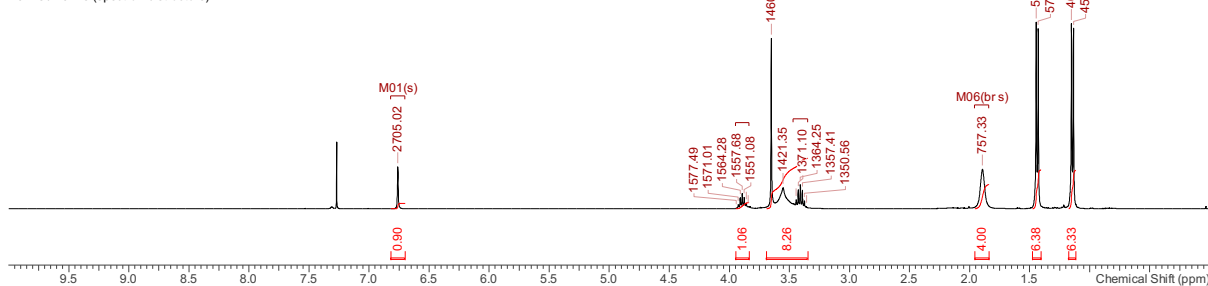

ju2519rb2.011.001.1r.esp  
13C  
CHLOROFORM-d  
15 C's / 15 C's (spectrum / structure)

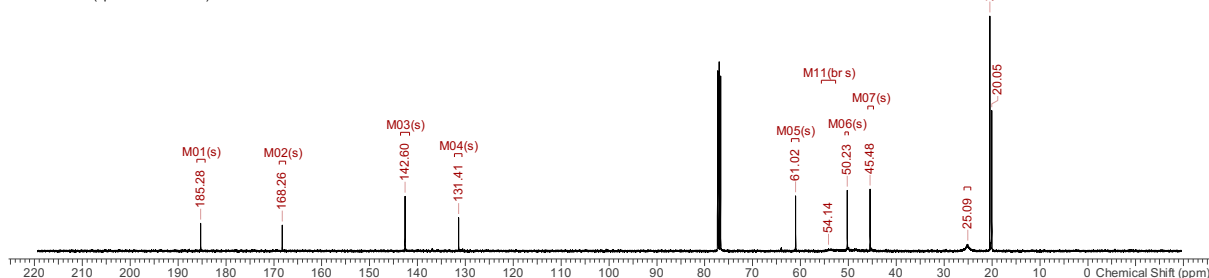

**(Z)-4-((3,5-Bis(trifluoromethyl)phenyl)(methyl)amino)-N,N-diisopropyl-3-methoxy-2-oxobut-3-enamide, 11c.**

To a solution of cyclobutenedione **9c** (353 mg, 1.00 mmol) in THF (40 mL) at  $-78\text{ }^{\circ}\text{C}$  was added LDA (2.0 M in THF/ethylbenzene/hexanes, 0.60 mL, 1.20 mmol). After 2 h, water (20 mL) was added then the reaction was warmed to RT. The aqueous phase was separated and extracted with DCM (3 $\times$ 30 mL) then the organic phases were combined, dried over  $\text{MgSO}_4$  and concentrated *in vacuo*.

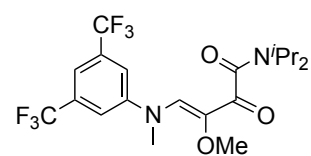

Purification by column chromatography (20 % EtOAc/petrol) gave the title compound **11c** (282 mg, 0.62 mmol, 62 %) as a red oil,  $v_{\text{max}}$  (film) 2976 (br), 1629 (s), 1594 (s), 1473 (w), 1384 (s), 1352 (w), 1277 (s), 1263 (m), 1218 (w), 1185 (s);  $\delta_{\text{H}}$  (400 MHz,  $\text{CDCl}_3$ ) 7.60 (br s, 1H, ArH), 7.47 (br s, 2H, 2 $\times$ ArH), 7.03 (s, 1H, =CH), 3.86 (spt,  $J = 6.7$  Hz, 1H, CH( $\text{CH}_3$ ) $_2$ ), 3.72 (br s, 3H,  $\text{CH}_3$ ), 3.69 (s, 3H,  $\text{CH}_3$ ), 3.50 (spt,  $J = 6.8$  Hz, 1H, CH( $\text{CH}_3$ ) $_2$ ), 1.48 (d,  $J = 6.8$  Hz, 6H, CH( $\text{CH}_3$ ) $_2$ ), 1.23 (d,  $J = 6.7$  Hz, 6H, CH( $\text{CH}_3$ ) $_2$ );  $\delta_{\text{C}}$  (100 MHz,  $\text{CDCl}_3$ ) 188.3 (C), 167.2 (C), 147.3 (CH), 135.9 (C), 132.9 (q,  $J = 33.8$  Hz, 2 $\times$ C), 122.9 (q,  $J = 272.9$  Hz, 2 $\times$ CF $_3$ ), 118.1 (br s, 2 $\times$ CH), 116.9 (br s, CH), 60.8 (CH $_3$ ), 50.4 (CH), 45.9 (CH), 37.3 (CH $_3$ ), 20.6 (2 $\times$ CH $_3$ ), 20.0 (2 $\times$ CH $_3$ ), one C not observed;  $\delta_{\text{F}}$  ( $\text{CDCl}_3$ , 376MHz)  $-63.19$  (s, 6F, 2 $\times$ CF $_3$ ); LRMS (ESI $^+$ ) 477 (5 %, [M+Na] $^+$ ), 455 (100 %, [MH] $^+$ ); HRMS (ESI $^+$ ) C $_{20}$ H $_{24}$ F $_6$ N $_2$ NaO $_3$  [M+Na] $^+$  calculated 477.1583, observed 477.1586; C $_{20}$ H $_{25}$ F $_6$ N $_2$ O $_3$  [MH] $^+$  calculated 455.1764, observed 455.1763.

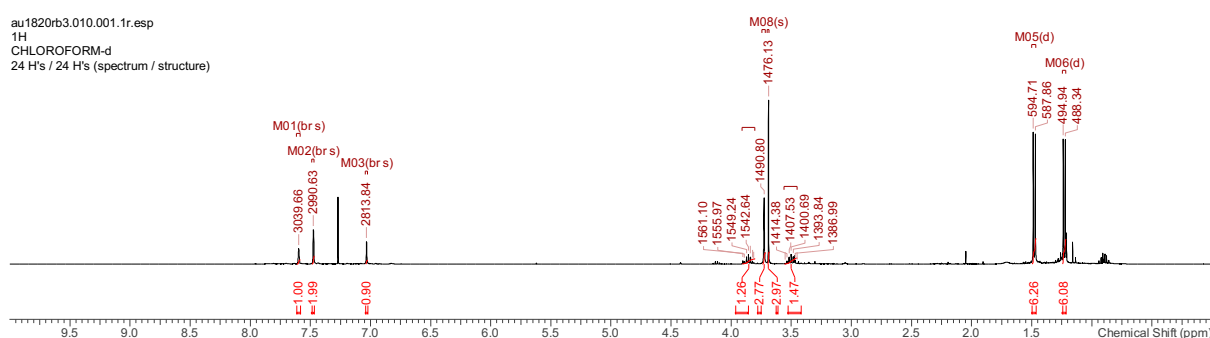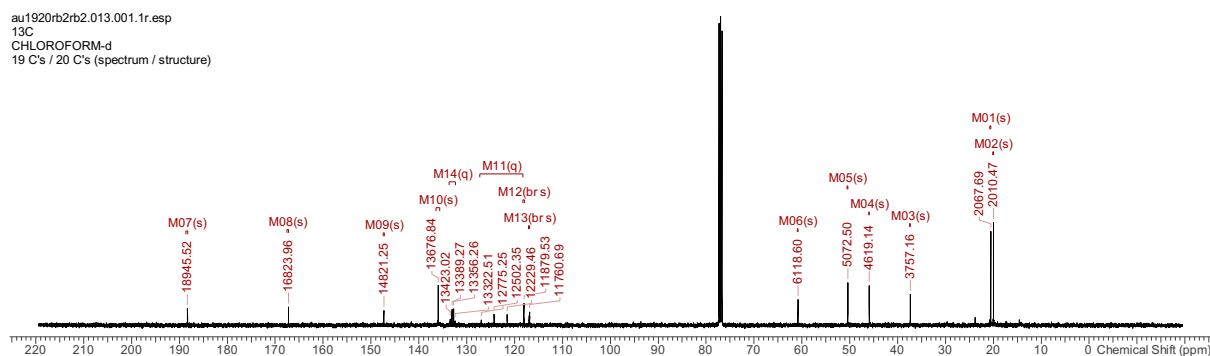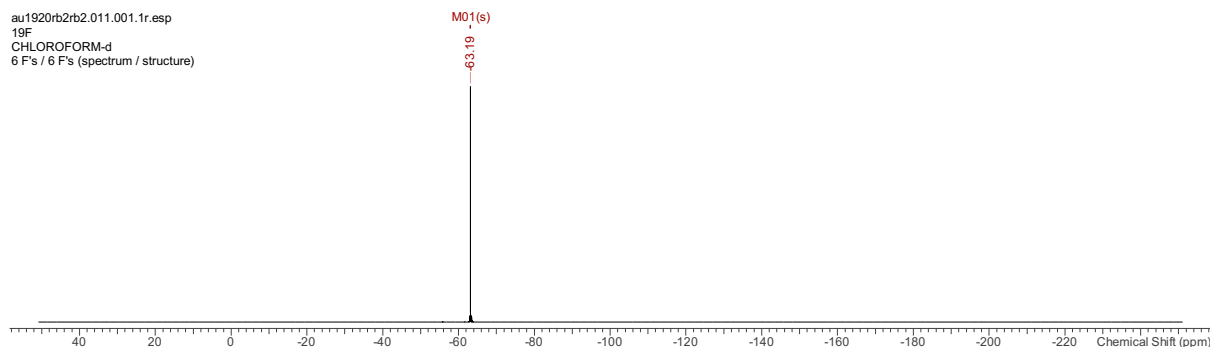**(Z)-3-(tert-Butoxy)-4-(dimethylamino)-N,N-diisopropyl-2-oxobut-3-enamide, 11d**

To a solution of cyclobutenedione **9d** (100 mg, 0.51 mmol) in THF (20 mL) at  $-78\text{ }^{\circ}\text{C}$  was added LDA (1.0 M in THF/hexanes, 0.56 mL, 0.56 mmol). After 2 h, water (20 mL) was added then the reaction was warmed to RT. The aqueous phase was separated and extracted with DCM (3 $\times$ 20 mL) then the organic phases were combined, dried over  $\text{MgSO}_4$  and concentrated *in vacuo*. Purification by column chromatography (50 % EtOAc/petrol) gave the

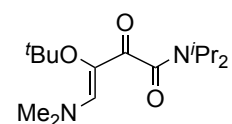

title compound **11d** (126 mg, 0.42 mmol, 83 %) as a yellow oil that solidified on standing, m.p. 112–113 °C;  $\nu_{\max}$  (film) 2972 (m), 2932 (m), 1629 (s), 1572 (s), 1445 (m), 1421 (w), 1365 (s), 1279 (s), 1204 (m), 1166 (w);  $\delta_{\text{H}}$  (400 MHz,  $\text{CDCl}_3$ ) 6.63 (s, 1H, =CH), 3.88 (spt,  $J = 6.6$  Hz, 1H, CH(CH<sub>3</sub>)<sub>2</sub>), 3.42 (spt,  $J = 6.8$  Hz, 1H, CH(CH<sub>3</sub>)<sub>2</sub>), 3.10 (br s, 6H, N(CH<sub>3</sub>)<sub>2</sub>), 1.47 (d,  $J = 6.8$  Hz, 6H, CH(CH<sub>3</sub>)<sub>2</sub>), 1.32 (s, 9H, C(CH<sub>3</sub>)<sub>3</sub>), 1.14 (d,  $J = 6.6$  Hz, 6H, NCH(CH<sub>3</sub>)<sub>2</sub>);  $\delta_{\text{C}}$  (100 MHz,  $\text{CDCl}_3$ ) 187.9 (C), 169.2 (C), 148.5 (CH), 126.5 (C), 80.9 (C), 50.2 (CH), 45.5 (CH), 42.5 (br, 2×CH<sub>3</sub>), 28.4 (3×CH<sub>3</sub>), 20.4 (2×CH<sub>3</sub>), 20.1 (2×CH<sub>3</sub>); LRMS (ESI<sup>+</sup>) 321 (14 %, [M+Na]<sup>+</sup>), 299 (100 %, [MH]<sup>+</sup>); HRMS (ESI<sup>+</sup>) C<sub>16</sub>H<sub>30</sub>N<sub>2</sub>NaO<sub>3</sub> [M+Na]<sup>+</sup> calculated 321.2149, observed 321.2151; C<sub>16</sub>H<sub>31</sub>N<sub>2</sub>O<sub>3</sub> [MH]<sup>+</sup> calculated 299.2329, observed 299.2329.

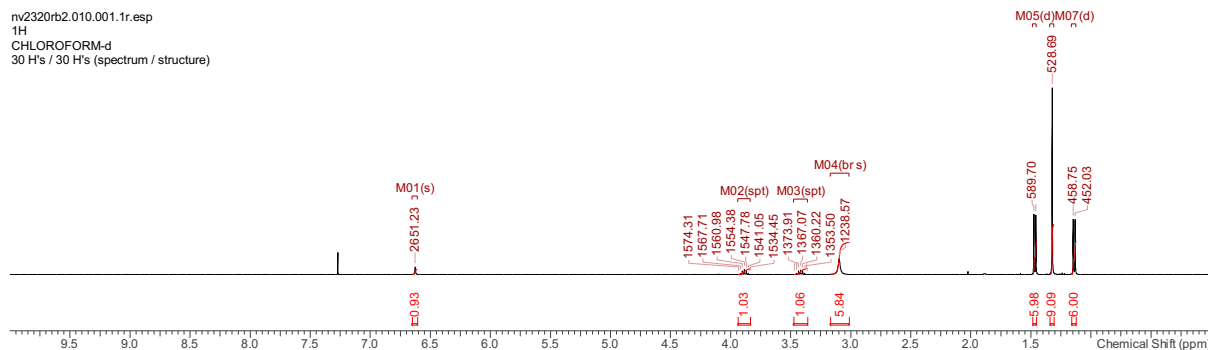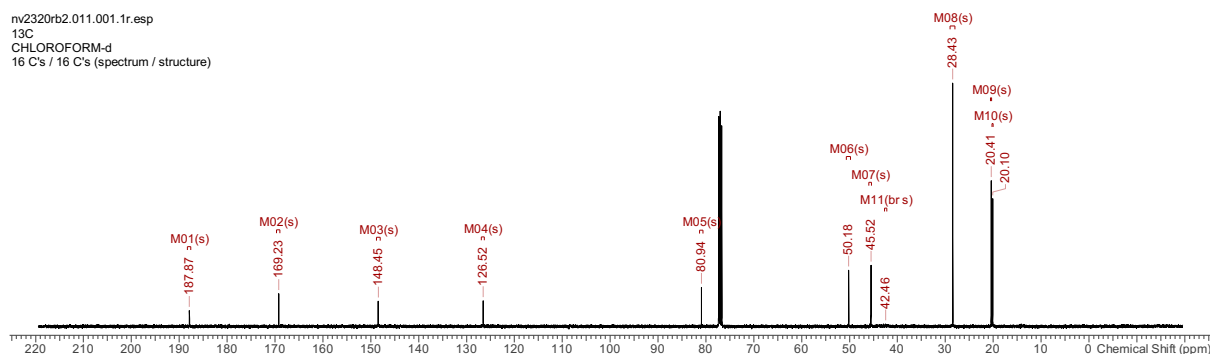

### (Z)-3-(tert-Butoxy)-4-(diethylamino)-N,N-diisopropyl-2-oxobut-3-enamide, **11e**

To a solution of DIPA (0.17 mL, 1.2 mmol) in THF (15 mL) at 0 °C was added *n*-butyllithium (2.5 M in hexane, 0.48 mL, 1.20 mmol) dropwise. After 20 min, the solution was added *via* cannula to a solution of cyclobutenedione **9e** (225 mg, 1.00 mmol) in THF (15 mL) at –78 °C. After a further 90 min, water (10 mL) was added, and the solution warmed to RT. The aqueous phase was separated and extracted with DCM (3×30 mL) then the combined organic phases were dried over MgSO<sub>4</sub> and concentrated *in vacuo*. Purification by column chromatography (20 – 40 % ethyl acetate/petrol) afforded firstly recovered starting material (81 mg, 0.36 mmol, 36 %) as a white solid followed by the title compound **11e** (161 mg, 0.49 mmol, 49 %) as a colourless oil,  $\nu_{\max}$ , (film) 2972 (br), 2934 (w), 2359 (w), 1629 (m), 1569 (s), 1444 (m), 1367 (m), 1307 (w), 1253 (s), 1212 (w);  $\delta_{\text{H}}$  (400 MHz,  $\text{CDCl}_3$ ) 6.67 (s, 1H, =CH), 3.87 (spt,  $J = 6.6$  Hz, 1H, NCH), 3.40 (br s, 4H, N(CH<sub>2</sub>CH<sub>3</sub>)<sub>2</sub>), 3.39 (spt,  $J = 6.8$  Hz, 1H, NCH), 1.45 (d,  $J = 6.8$  Hz, 6H, NCH(CH<sub>3</sub>)<sub>2</sub>), 1.29 (s, 9H, C(CH<sub>3</sub>)<sub>3</sub>), 1.12 (br t,  $J = 6.7$  Hz, 6H, N(CH<sub>2</sub>CH<sub>3</sub>)<sub>2</sub>), 1.11 (d,  $J = 6.6$  Hz, 6H, NCH(CH<sub>3</sub>)<sub>2</sub>);  $\delta_{\text{C}}$  (100 MHz,  $\text{CDCl}_3$ ) 187.8 (C), 169.3 (C), 146.8 (CH), 126.5 (C), 81.2 (C), 50.2 (CH), 45.4 (CH), 42.7 (br, 2×CH<sub>2</sub>), 28.4 (3×CH<sub>3</sub>), 20.3 (4×CH<sub>3</sub>), 20.0 (4×CH<sub>3</sub>), 13.8 (br, 2×CH<sub>3</sub>); LRMS (ESI<sup>+</sup>) 327 (100 %, [MH]<sup>+</sup>); HRMS (ESI<sup>+</sup>) C<sub>18</sub>H<sub>34</sub>N<sub>2</sub>NaO<sub>3</sub> [M+Na]<sup>+</sup> calculated 349.2462, observed 349.2470, C<sub>18</sub>H<sub>35</sub>N<sub>2</sub>O<sub>3</sub> [MH]<sup>+</sup> calculated 327.2642, observed 327.2649.

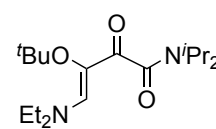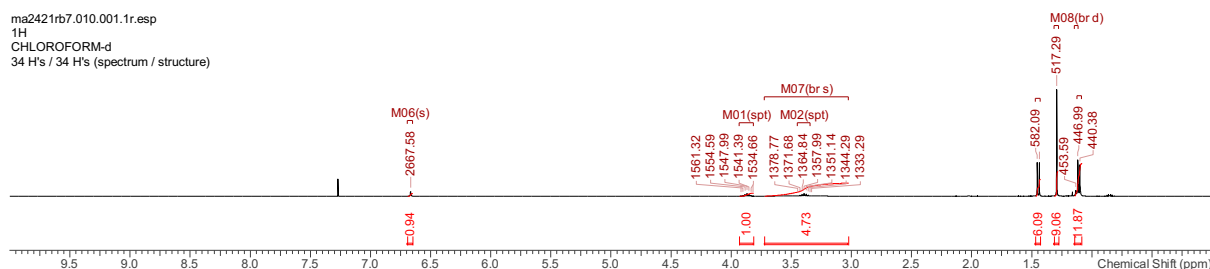

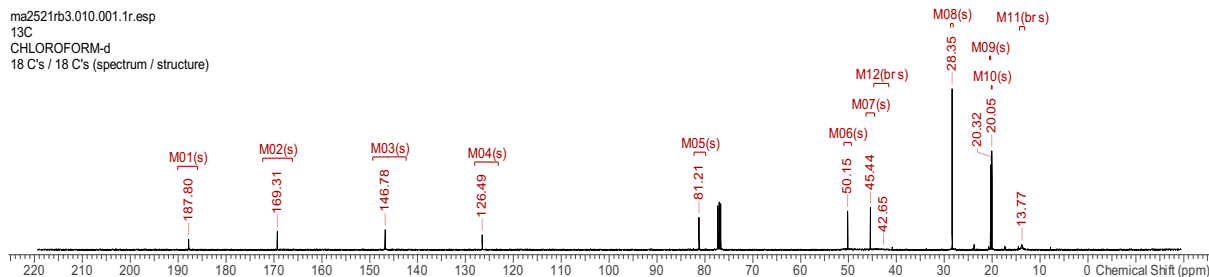

### (Z)-4-((4-Bromophenyl)(methyl)amino)-N,N-diisopropyl-3-methoxy-2-oxobut-3-enamide, **11f**

To a solution of cyclobutenedione **9f** (296 mg, 1.00 mmol) in THF (40 mL) at  $-78$  °C was added LDA (2.0M in THF/ethylbenzene/hexanes, 0.60 mL, 1.20 mmol). After 2 h, water (20 mL) was added then the solution was warmed to RT. The aqueous phase was separated and extracted with DCM (3×30 mL) then the organic phases were combined, dried over  $MgSO_4$  and concentrated *in vacuo*. Purification by column chromatography (20–30 % EtOAc/petrol) gave the title compound **11f** (257 mg, 0.65 mmol, 65 %) as a red solid, mp  $171$ – $173$  °C;  $\nu_{max}$  (film) 2972 (br), 2935 (br), 1630 (s), 1600 (s), 1572 (s), 1491 (s), 1446 (s), 1446 (m), 1415 (w), 1370 (w);  $\delta_H$  (400 MHz,  $CDCl_3$ ) 7.48–7.44 (m, 2H, 2×ArH), 7.04 (br s, 1H, =CH), 7.02–6.96 (m, 2H, 2×ArH), 3.87 (spt,  $J = 6.6$  Hz, 1H, NCH), 3.71 (br s, 3H,  $CH_3$ ), 3.62 (s, 3H,  $CH_3$ ), 3.47 (spt,  $J = 6.8$  Hz, 1H, NCH), 1.46 (d,  $J = 6.8$  Hz, 6H,  $CH(CH_3)_2$ ), 1.19 (d,  $J = 6.6$  Hz, 6H,  $CH(CH_3)_2$ );  $\delta_C$  (100 MHz,  $CDCl_3$ ) 188.0 (C), 167.8 (C), 145.8 (CH), 134.3 (C), 132.4 (2×CH), 120.8 (2×CH), 117.4 (C), 61.0 ( $CH_3$ ), 50.3 ( $CH_3$ ), 45.7 (CH), 37.4 (CH), 20.6 (2× $CH_3$ ), 20.1 (2× $CH_3$ ), one C coincident or not observed; LRMS (ESI<sup>+</sup>) 421 (24 %,  $[M\{^{81}Br\}+Na]^+$ ), 419 (25 %,  $[M\{^{79}Br\}+Na]^+$ ), 399 (100 %,  $[M\{^{81}Br\}H]^+$ ), 397 (90 %,  $[M\{^{79}Br\}H]^+$ ); HRMS (ESI<sup>+</sup>)  $C_{18}H_{25}^{79}BrN_2NaO_3$   $[M+Na]^+$  calculated 419.0941, observed 419.0940;  $C_{18}H_{26}^{79}BrN_2O_3$   $[MH]^+$  calculated 397.1121, observed 397.1118; X-ray CCDC2042398.

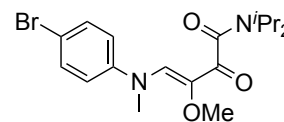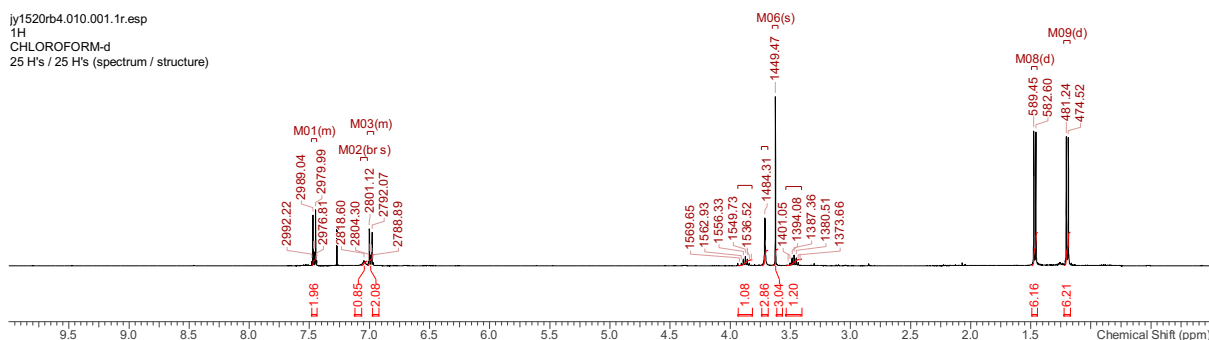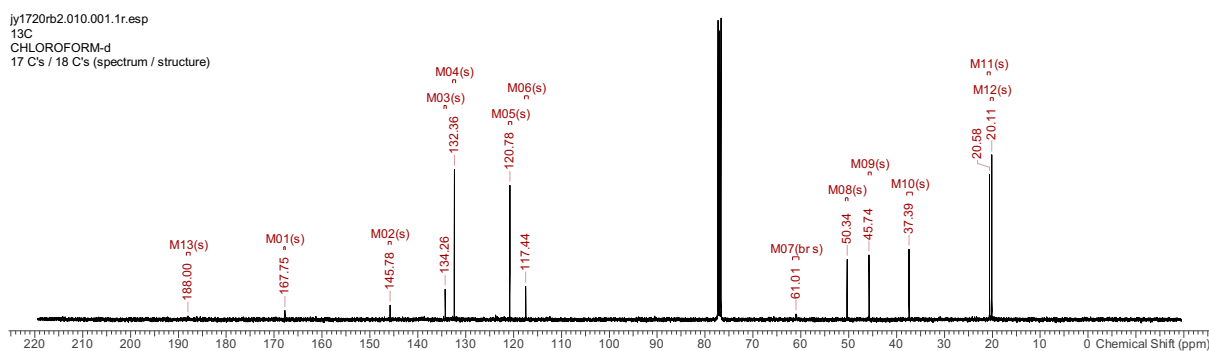

### (Z)-4-(Dimethylamino)-3-methoxy-1-(piperidin-1-yl)but-3-ene-1,2-dione, **12a** and 3-Methoxy-4-(pyrrolidin-1-yl)cyclobut-3-ene-1,2-dione, **13a**<sup>8</sup>

To a solution of piperidine (0.11 mL, 1.11 mmol) in THF (40 mL) at 0 °C was added *n*-butyllithium (2.5 M in hexanes, 0.44 mL, 1.10 mmol) dropwise. After 20 min, the solution was cooled to  $-78$  °C then cyclobutenedione **9a** (155 mg, 1.00 mmol) in THF (10 mL) was added.

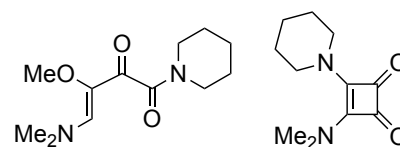

After a further 2 h, water (20 mL) was added then the solution was warmed to RT. The aqueous phase was separated and extracted with DCM (3×40 mL) then the organic phases were combined, dried over  $MgSO_4$

and concentrated *in vacuo*. Purification by column chromatography (90–100 % EtOAc/petrol) afforded firstly cyclobutenedione **13a** (21 mg, 0.10 mmol, 10 %) as a white solid, m.p. 138–140 °C;  $\nu_{\max}$  (film) 3016 (w), 2943 (w), 1786 (w), 1677 (m), 1585 (s), 1522 (s), 1449 (m), 1411 (m), 1304 (w), 1247 (w);  $\delta_{\text{H}}$  (400 MHz,  $\text{CDCl}_3$ ) 3.64–3.58 (m, 4H,  $2 \times \text{NCH}_2$ ), 3.21 (s, 6H,  $\text{N}(\text{CH}_3)_2$ ), 1.71–1.67 (m, 6H,  $3 \times \text{CH}_2$ );  $\delta_{\text{C}}$  (100 MHz,  $\text{CDCl}_3$ ) 184.3 (C), 184.3 (C), 169.6 (C), 168.1 (C), 49.9 ( $2 \times \text{CH}_2$ ), 41.0 ( $2 \times \text{CH}_3$ ), 26.0 ( $2 \times \text{CH}_2$ ), 23.6 ( $\text{CH}_2$ ); LRMS ( $\text{ESI}^+$ ) 231 (15 %,  $[\text{M}+\text{Na}]^+$ ), 209 (100 %,  $[\text{MH}]^+$ ); HRMS ( $\text{ESI}^+$ )  $\text{C}_{11}\text{H}_{16}\text{N}_2\text{NaO}_2$   $[\text{M}+\text{Na}]^+$  calculated 231.1104, observed 231.1106;  $\text{C}_{11}\text{H}_{17}\text{N}_2\text{O}_2$   $[\text{MH}]^+$  calculated 209.1285, observed 209.1286; then the title compound **12a** (147 mg, 0.61 mmol, 61 %) as a yellow oil,  $\nu_{\max}$  (film) 2936 (br), 2858 (w), 1626 (s), 1563 (s), 1445 (m), 1420 (m), 1404 (m), 1364 (w), 1323 (s), 1282 (w);  $\delta_{\text{H}}$  (400 MHz,  $\text{CDCl}_3$ ) 6.58 (s, 1H, =CH), 3.66 (s, 3H,  $\text{OCH}_3$ ), 3.56–3.52 (m, 2H,  $2 \times \text{NCHH}$ ), 3.35–3.30 (m, 2H,  $2 \times \text{NCHH}$ ), 3.12 (s, 6H,  $\text{N}(\text{CH}_3)_2$ ), 1.67–1.60 (m, 2H,  $\text{CH}_2$ ), 1.60–1.52 (m, 4H,  $2 \times \text{CH}_2$ );  $\delta_{\text{C}}$  (100 MHz,  $\text{CDCl}_3$ ) 185.2 (C), 166.8 (C), 146.1 (CH), 131.6 (C), 60.6 ( $\text{CH}_3$ ), 47.4 ( $\text{CH}_2$ ), 42.1 ( $\text{CH}_2$ ), 41.4 (br,  $2 \times \text{CH}_3$ ), 26.3 ( $\text{CH}_2$ ), 25.5 ( $\text{CH}_2$ ), 24.4 ( $\text{CH}_2$ ); LRMS ( $\text{ESI}^+$ ) 263 (10 %,  $[\text{M}+\text{Na}]^+$ ), 241 (100 %,  $[\text{MH}]^+$ ); HRMS ( $\text{ESI}^+$ )  $\text{C}_{12}\text{H}_{20}\text{N}_2\text{NaO}_3$   $[\text{M}+\text{Na}]^+$  calculated 263.1366, observed 263.1369;  $\text{C}_{12}\text{H}_{21}\text{N}_2\text{O}_3$   $[\text{MH}]^+$  calculated 241.1547, observed 241.1549.

### 3,4-Bis(dimethylamino)cyclobut-3-ene-1,2-dione, **13b**<sup>9</sup>

To a solution of cyclobutenedione **9a** (155 mg, 1.00 mmol) in THF (40 mL) at  $-78$  °C was added  $\text{LiNMe}_2$  (5 wt% in hexanes, 1.80 mL, 1.20 mmol). After 3 h, water (20 mL) was added then the solution was warmed to RT. The aqueous phase was separated and extracted with DCM ( $3 \times 40$  mL), then the organic phases were combined, dried over  $\text{MgSO}_4$  and concentrated *in vacuo*. Purification by column chromatography (0–10 % MeOH/EtOAc) afforded firstly recovered starting material **9a** (61 mg, 0.40 mmol, 40 %) as a white solid the the title compound **13b** (81 mg, 0.48 mmol, 48 %) as a white solid, m.p. 219–220 °C ( $\text{Et}_2\text{O}$ )  $\delta_{\text{H}}$  (400 MHz,  $\text{CDCl}_3$ ) 3.25 (s,  $4 \times \text{NCH}_3$ );  $\delta_{\text{C}}$  (100 MHz,  $\text{CDCl}_3$ ) 183.9, ( $2 \times \text{C}$ ) 169.1 ( $2 \times \text{C}$ ), 41.4 ( $4 \times \text{CH}_3$ ); LC-MS ( $\text{ESI}^+$ ) 191 (22 %,  $[\text{M}+\text{Na}]^+$ ), 169 (100 %,  $[\text{MH}]^+$ ). Data consistent with literature values.<sup>9</sup>

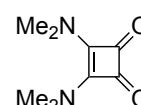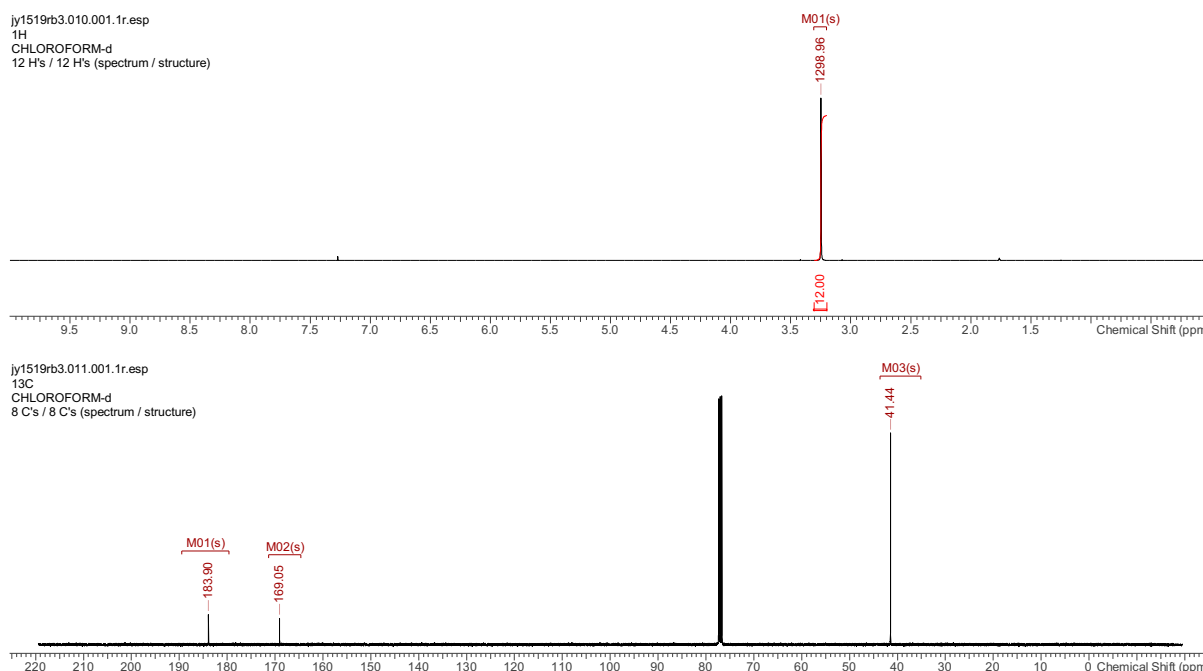

### (Z)-4-Amino-N,N-diisopropyl-3-methoxy-2-oxobut-3-enamide, **14**

To a solution of DIPA (0.16 mL, 1.11 mmol) in THF (10 mL) at 0 °C was added *n*-butyllithium (2.5 M in hexanes, 0.47 mL, 1.17 mmol) dropwise. After 20 min the solution was added *via* cannula to a solution of cyclobutenedione **1a** (150 mg, 1.06 mmol) in THF (30 mL) at  $-78$  °C. After a further 2 h, ammonia (7 M in methanol, 10 mL) was added then the reaction mixture was warmed to RT over 1 h. The aqueous phase was separated and extracted with DCM ( $3 \times 30$  mL) then the organic phases were combined, dried over  $\text{MgSO}_4$  and concentrated *in vacuo*. Purification by column chromatography (30–80 % EtOAc/petrol) gave the title compound **14** (171 mg, 0.75

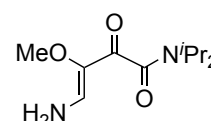

mmol, 71 %) as a white solid, m.p. 216–218 °C (EtOAc/hexane);  $\nu_{\max}$  (neat) 3371 (m), 3198 (br), 2982 (br), 2360 (m), 1665 (m), 1628 (s), 1612 (s), 1535 (s), 1469 (m), 1457 (m);  $\delta_{\text{H}}$  (400 MHz, DMSO- $d_6$ ) 6.98 (br s, 2H,  $\text{NH}_2$ ), 6.78 (t,  $J = 10.8$  Hz, 1H, =CH), 3.70 (spt,  $J = 6.5$  Hz, 1H, NCH), 3.51 (s, 3H,  $\text{OCH}_3$ ), 3.49 (spt,  $J = 6.7$  Hz, 1H, NCH), 1.35 (d,  $J = 6.8$  Hz, 6H,  $\text{CH}(\text{CH}_3)_2$ ), 1.10 (d,  $J = 6.6$  Hz, 6H,  $\text{CH}(\text{CH}_3)_2$ );  $\delta_{\text{C}}$  (100 MHz, DMSO- $d_6$ ) 183.4 (C), 167.6 (C), 144.5 (CH), 131.4 (C), 58.3 ( $\text{CH}_3$ ), 49.8 (CH), 44.4 (CH), 20.0 ( $2 \times \text{CH}_3$ ), 19.9 ( $2 \times \text{CH}_3$ ); LRMS (ESI $^+$ ) 229 (100 %,  $[\text{MH}]^+$ ); HRMS (ESI $^+$ )  $\text{C}_{11}\text{H}_{20}\text{N}_2\text{NaO}_3$   $[\text{M}+\text{Na}]^+$  calculated 251.1366, observed 251.1367.

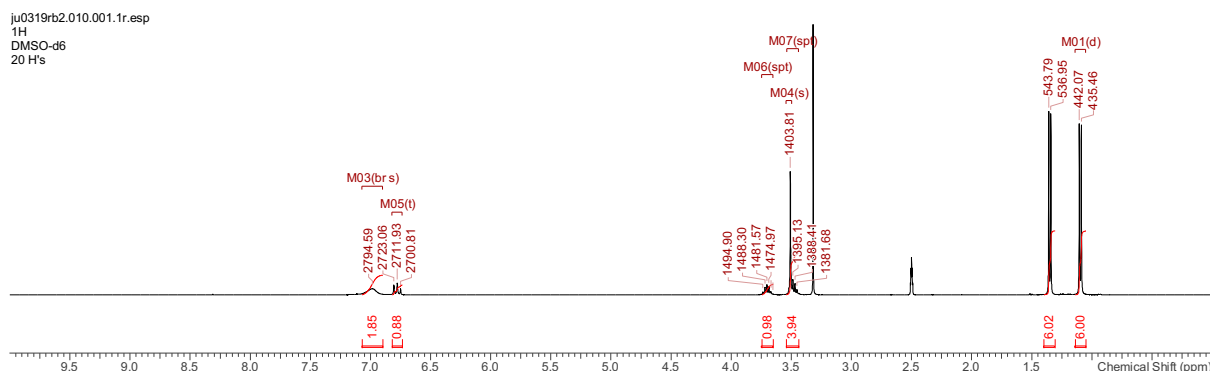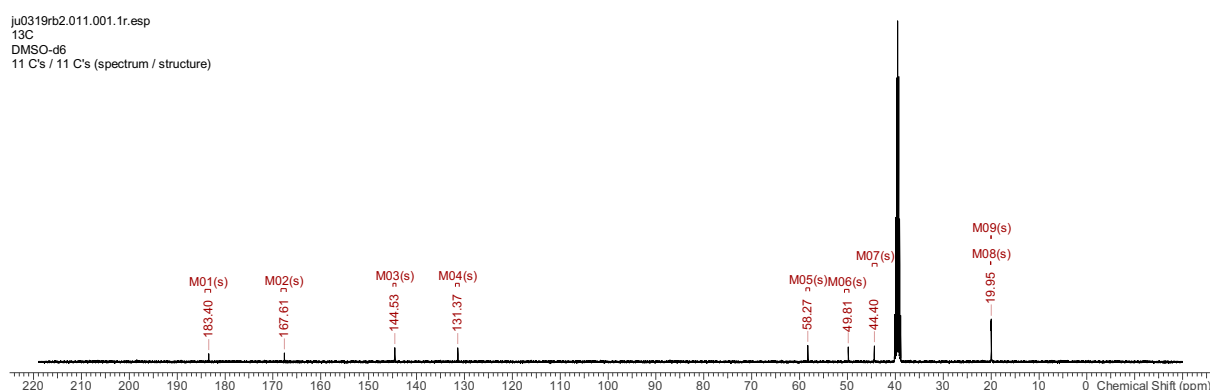

### (Z)-4-Amino-3-methoxy-1-(piperidin-1-yl)but-3-ene-1,2-dione, **15**

To a solution of piperidine (0.11 mL, 1.11 mmol) in THF (10 mL) at 0 °C was added *n*-butyllithium (2.5 M in hexanes, 0.47 mL, 1.17 mmol) dropwise. After 20 min the solution was added *via* cannula to a solution of cyclobutenedione **1a** (150 mg, 1.06 mmol) in THF (30 mL) at -78 °C. After a further 2 h, ammonia (7 M in methanol, 10 mL) was added then the reaction mixture was warmed to RT over 1 h. The aqueous phase was separated and extracted with DCM (3×30 mL) then the organic phases were combined, dried over  $\text{MgSO}_4$  and concentrated *in vacuo*. Purification by column chromatography (50–80 % EtOAc/petrol) gave the title compound **15** (157 mg, 0.74 mmol, 70 %) as a white solid, m.p. 204–205 °C (EtOAc/hexane);  $\nu_{\max}$  (neat) 3377 (m), 3288 (w), 3236 (w), 2932 (m), 2859 (w), 2360 (w), 1665 (w), 1628 (s), 1610 (s), 1540 (s);  $\delta_{\text{H}}$  (400 MHz, DMSO- $d_6$ ) 7.19–6.98 (m, 2H,  $\text{NH}_2$ ), 6.86 (t,  $J = 11.3$  Hz, 1H, =CH), 3.52 (s, 3H,  $\text{OCH}_3$ ), 3.45–3.42 (m, 2H,  $2 \times \text{NCHH}$ ), 3.23–3.20 (m, 2H,  $2 \times \text{NCHH}$ ), 1.63–1.55 (m, 2H,  $\text{CH}_2$ ), 1.52–1.40 (m, 4H,  $2 \times \text{CH}_2$ );  $\delta_{\text{C}}$  (100 MHz, DMSO- $d_6$ ) 183.1 (C), 166.2 (C), 145.2 (CH), 131.8 (C), 58.4 ( $\text{CH}_3$ ), 46.5 ( $\text{CH}_2$ ), 41.0 ( $\text{CH}_2$ ), 25.9 ( $\text{CH}_2$ ), 25.1 ( $\text{CH}_2$ ), 23.9 ( $\text{CH}_2$ ); LRMS (ESI $^+$ ) 213 (100 %,  $[\text{MH}]^+$ ); HRMS (ESI $^+$ )  $\text{C}_{10}\text{H}_{16}\text{N}_2\text{NaO}_3$   $[\text{M}+\text{Na}]^+$  calculated 235.1053, observed 235.1052;  $\text{C}_{10}\text{H}_{17}\text{N}_2\text{O}_3$   $[\text{MH}]^+$  calculated 213.1234, observed 213.1232.

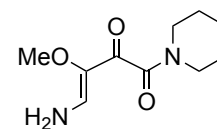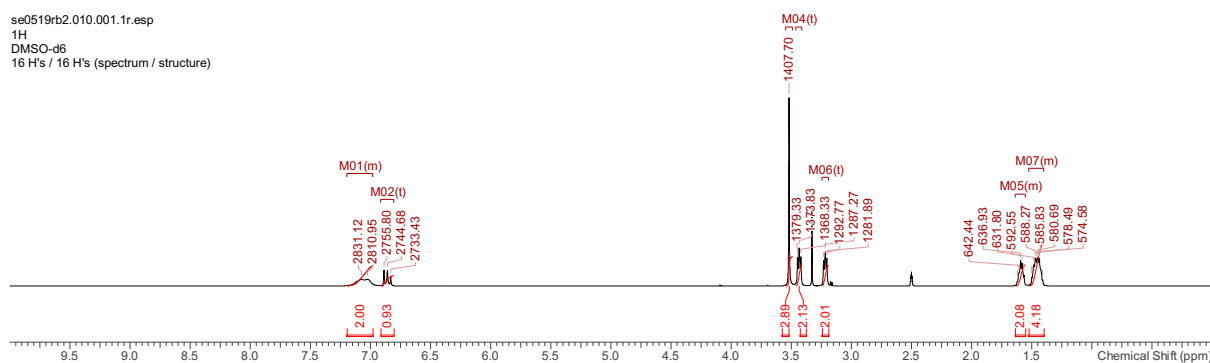

se0519rb2.011.001.1r.esp  
13C  
DMSO-d6  
10 C's / 10 C's (spectrum / structure)

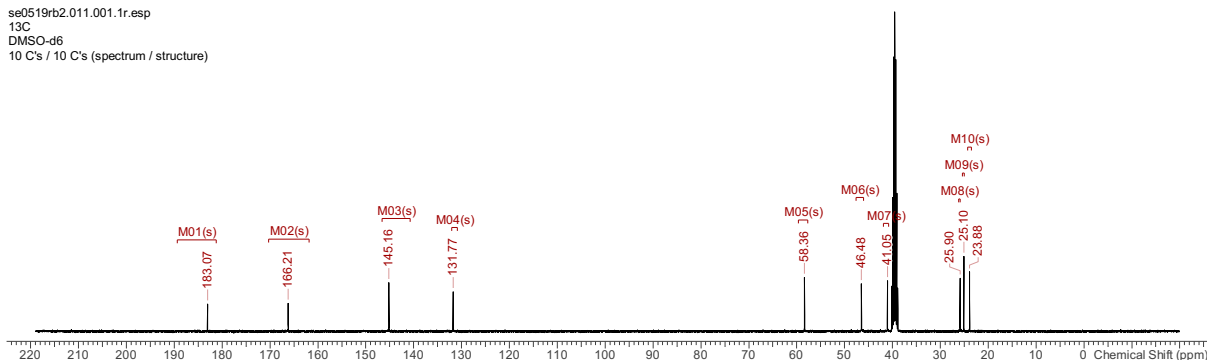

### 3-(*tert*-Butyl)-4-(piperidin-1-yl)cyclobut-3-ene-1,2-dione (**17**)

To a solution of piperidine (0.11 mL, 1.05 mmol) in THF (40 mL) at 0 °C was added *n*-butyllithium (2.5 M in hexanes, 0.42 mL, 1.05 mmol). After 20 min, the solution was cooled to –78 °C and cyclobutenedione **16a** (168 mg, 1.00 mmol) was added, followed after 2 h by water (20 mL). After warming to RT, the aqueous phase was separated and extracted with DCM (3×40 mL) then the organic phases were combined, dried over MgSO<sub>4</sub> and concentrated *in vacuo*. Purification by column chromatography (30 – 50 % ethyl acetate/petrol) gave the title compound **17** (88 mg, 0.40 mmol, 40 %) as a yellow oil,  $\nu_{\max}$  (film) 2940 (s), 2863 (m), 1772 (s), 1721 (m), 1580 (s), 1452 (m), 1413 (w), 1286 (m), 1259 (w), 1191 (m);  $\delta_{\text{H}}$  (400 MHz, CDCl<sub>3</sub>) 3.82 (br s, 4H, 2×CH<sub>2</sub>), 1.74 (br s, 6H, 3×CH<sub>2</sub>), 1.40 (s, 9H, C(CH<sub>3</sub>)<sub>3</sub>);  $\delta_{\text{C}}$  (100 MHz, CDCl<sub>3</sub>) 194.7 (C), 189.9 (C), 179.8 (C), 176.4 (C), 49.6 (br, 2×CH<sub>2</sub>), 33.8 (C), 29.5 (3×CH<sub>3</sub>), 26.0 (br, 2×CH<sub>2</sub>), 23.5 (CH<sub>2</sub>); LR-MS (ESI<sup>+</sup>) 244 (58 %, [M + Na]<sup>+</sup>), 222 (100 %, [M + H]<sup>+</sup>); HR-MS (ESI<sup>+</sup>) C<sub>13</sub>H<sub>19</sub>NNaO<sub>2</sub> [M + Na]<sup>+</sup> calculated 244.1308, observed 244.1308, C<sub>13</sub>H<sub>20</sub>NO<sub>2</sub> [M + H]<sup>+</sup> calculated 222.1489, observed 222.1492

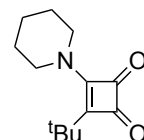

fe0821rb3.010.001.1r.esp  
1H  
CHLOROFORM-d  
19 H's / 19 H's (spectrum / structure)

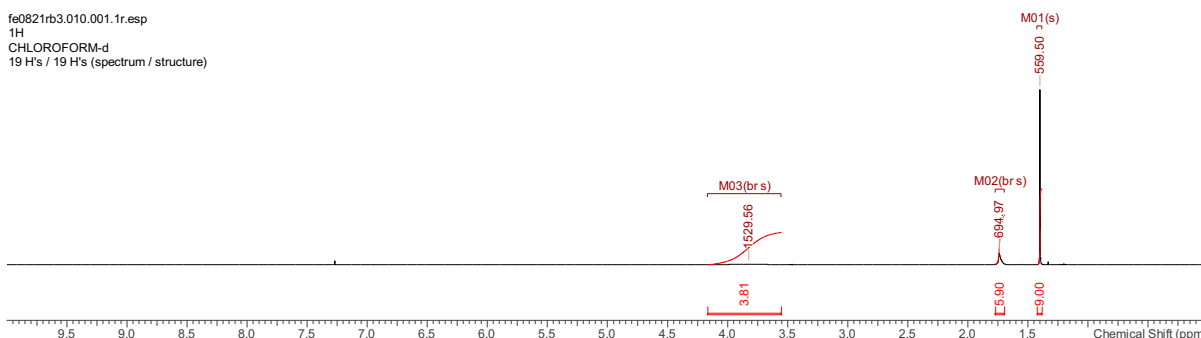

fe0821rb3.011.001.1r.esp  
13C  
CHLOROFORM-d  
13 C's / 13 C's (spectrum / structure)

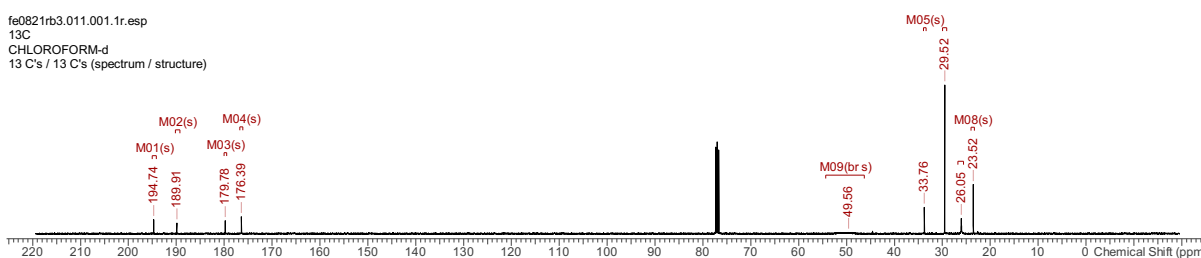

### (*E*)-*N,N*-Diisopropyl-3-(methoxymethylene)-4,4-dimethyl-2-oxopentanamide (**18a**)

To a solution of cyclobutenedione **16a** (168 mg, 1.00 mmol) in THF (40 mL) at –78 °C was added LDA (1.0 M in THF/hexanes, 1.05 mL, 1.05 mmol). After 2 h, water (20 mL) was added and the solution was warmed to RT. The aqueous phase was separated and extracted with DCM (3×30 mL) the the organic phases were combined, dried over MgSO<sub>4</sub> and concentrated *in vacuo*. Purification by column chromatography (10 – 20 % EtOAc/petrol) gave the title compound **18a** (92 mg, 0.34 mmol, 34 %) as yellow crystals, m.p. 84 – 85 °C;  $\nu_{\max}$  (film): 2971 (br), 1614 (s), 1446 (m), 1371 (m), 1349 (w), 1273 (s), 1243 (w), 1214 (m), 1140 (m), 1114 (w);  $\delta_{\text{H}}$  (400 MHz, CDCl<sub>3</sub>) 6.91 (s, 1H, =CH), 3.81 (s, 3H, OCH<sub>3</sub>), 3.70 (spt, *J* = 6.6 Hz, 1H, NCH), 3.45 (spt, *J* = 6.9 Hz, 1H, NCH), 1.48 (d, *J* = 6.9 Hz, 6H, CH(CH<sub>3</sub>)<sub>2</sub>), 1.29 (s, 9H, C(CH<sub>3</sub>)<sub>3</sub>), 1.19 (d, *J* = 6.6 Hz, 6H, CH(CH<sub>3</sub>)<sub>2</sub>);  $\delta_{\text{C}}$  (100 MHz, CDCl<sub>3</sub>) 193.7 (C), 167.6 (C),

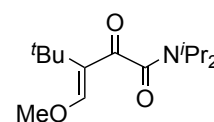



165.7 (CH), 124.7 (C), 62.5 (CH<sub>3</sub>), 50.1 (CH), 45.6 (CH), 34.3 (C), 29.7 (C(CH<sub>3</sub>)<sub>3</sub>), 20.3 (CH(CH<sub>3</sub>)<sub>2</sub>), 20.1 (CH(CH<sub>3</sub>)<sub>2</sub>); LR-MS (ESI<sup>+</sup>) 292 (10 %, [M + Na]<sup>+</sup>), 270 (100 %, [M + H]<sup>+</sup>); HR-MS (ESI<sup>+</sup>): C<sub>15</sub>H<sub>27</sub>NNaO<sub>3</sub> [M + Na]<sup>+</sup> calculated 292.1883, observed 292.1885, C<sub>15</sub>H<sub>28</sub>NO<sub>3</sub> [M + H]<sup>+</sup> calculated 270.2064, observed 270.2063.

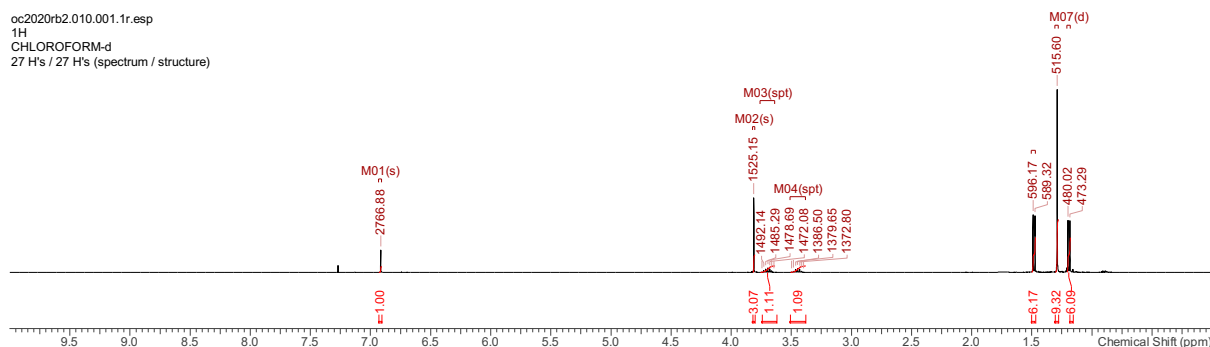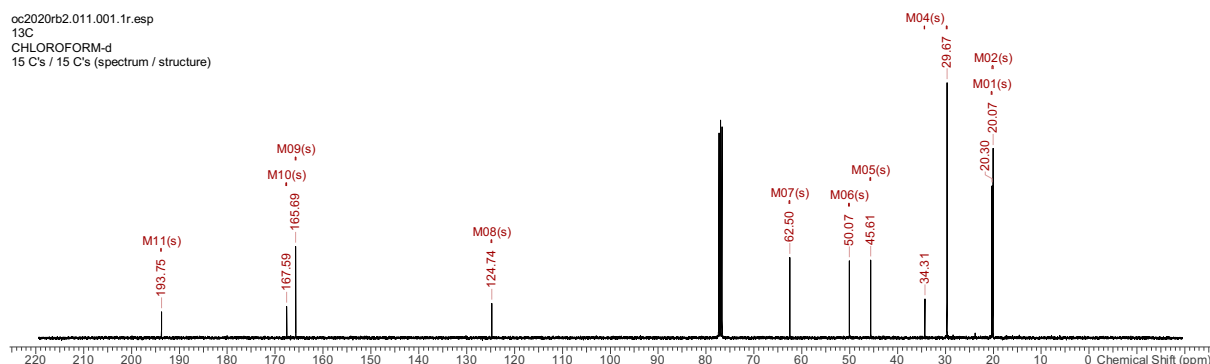

### (E)-4-Methoxy-3-methyl-1-(piperidin-1-yl)but-3-ene-1,2-dione, **18b**

To a solution of piperidine (0.10 mL, 1.05 mmol) in THF (10 mL) at 0 °C was added *n*-butyllithium (2.5M in hexanes, 0.42 mL, 1.05 mmol) dropwise. After 20 min the solution was added *via* cannula to a solution of cyclobutenedione **16b** (126 mg, 1.0 mmol) in THF (30 mL) at -78 °C. After a further 90 min, water (10 mL) was added, and the reaction mixture was warmed to RT. The aqueous phase was separated and extracted with DCM (3×30 mL) then the organic phases were combined, dried over MgSO<sub>4</sub> and concentrated *in vacuo*. Purification by column chromatography (30–80 % EtOAc/petrol) gave the title compound **18b** (167 mg, 0.79 mmol, 79 %) as a yellow oil,  $\nu_{\max}$  (film) 3482 (br), 2939 (br), 2858 (m), 1734 (br), 1612 (s), 1446 (m), 1395 (w), 1365 (w), 1314 (w), 1248 (s);  $\delta_{\text{H}}$  (400 MHz, CDCl<sub>3</sub>) 7.16 (q, *J* = 1.2 Hz, 1H, =CH), 3.88 (s, 3H, OCH<sub>3</sub>), 3.58–3.55 (m, 2H, NCHH), 3.22–3.19 (m, 2H, NCHH), 1.70 (d, *J* = 1.1 Hz, 3H, CH<sub>3</sub>), 1.67–1.51 (m, 6H, 3×CH<sub>2</sub>);  $\delta_{\text{C}}$  (100 MHz, CDCl<sub>3</sub>) 192.6 (C), 166.0 (C), 165.7 (CH), 115.1 (C), 62.0 (CH<sub>3</sub>), 47.1 (CH<sub>2</sub>), 42.1 (CH<sub>2</sub>), 26.2 (CH<sub>2</sub>), 25.4 (CH<sub>2</sub>), 24.3 (CH<sub>2</sub>), 6.9 (CH<sub>3</sub>); LRMS (ESI<sup>+</sup>) 212 (100 %, [MH]<sup>+</sup>); HRMS (ESI<sup>+</sup>) C<sub>11</sub>H<sub>18</sub>NO<sub>3</sub> [MH]<sup>+</sup> calculated 212.1281, observed 212.1283.

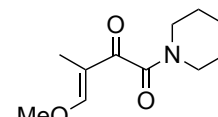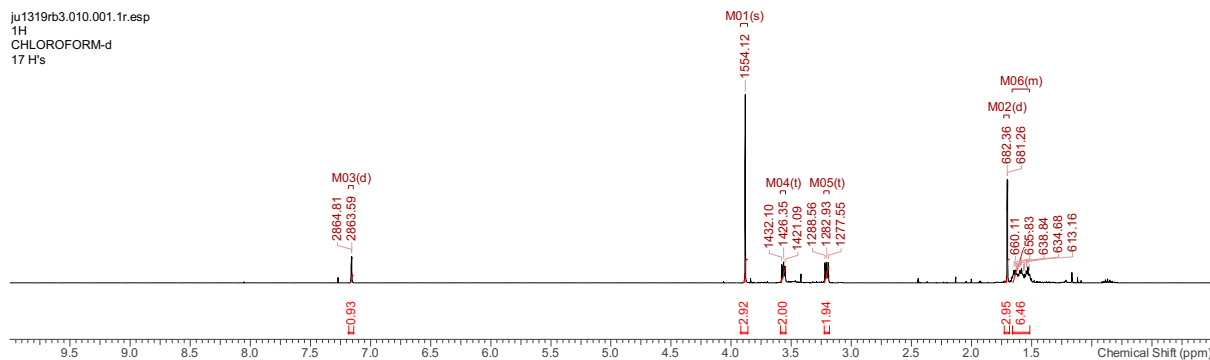

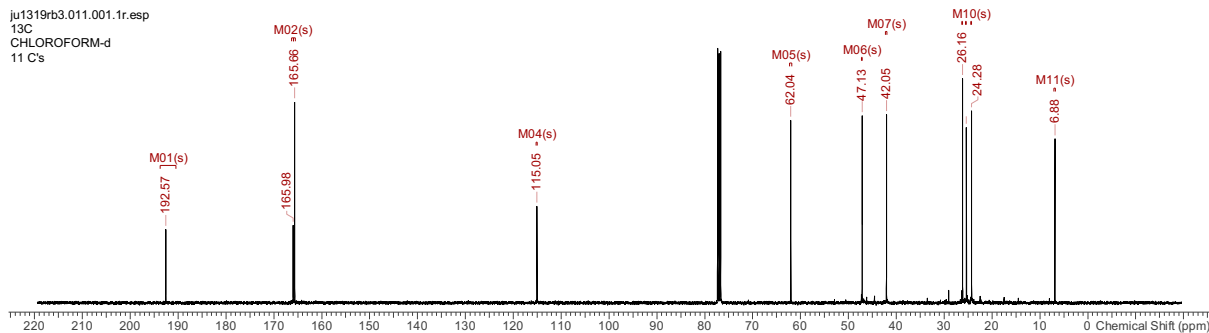

### 3-Methoxy-4-methylcyclobutane-1,2-dione, **19**

To a solution of cyclobutenedione **16b** (187 mg, 1.48 mmol) in THF (50 mL) at  $-78\text{ }^{\circ}\text{C}$  was added LDA (1 M in THF/hexanes, 1.56 mL, 1.56 mmol) followed after 2 h by water (20 mL). After warming to RT, the aqueous phase was separated and extracted with DCM (3 $\times$ 40 mL). The organic phases were then combined, dried over  $\text{MgSO}_4$  and concentrated *in vacuo*. Purification by column chromatography (ethyl acetate) yielded the title compound **19** (113 mg, 0.88 mmol, 60 %) as a sensitive yellow oil,  $\nu_{\text{max}}$  (film) 2925 (m), 1751 (m), 1616 (s), 1457 (m), 1385 (m), 1341 (s), 1150 (w), 1046 (w), 974 (w) 814 (w);  $\delta_{\text{H}}$  (400 MHz,  $\text{CDCl}_3$ ) 5.14 (dq,  $J=6.3, 1.8$  Hz, 1H, CH), 4.17 (s, 3H,  $\text{OCH}_3$ ), 2.88 (d,  $J=6.3$  Hz, 1H, CH), 1.70 (d,  $J=1.8$  Hz, 3H,  $\text{CH}_3$ );  $\delta_{\text{C}}$  (100 MHz,  $\text{CDCl}_3$ ) 205.1 (C), 181.5 (C), 81.9 (CH), 63.1 (CH), 59.7 ( $\text{OCH}_3$ ), 6.3 (CH<sub>3</sub>); LR-MS (ESI<sup>+</sup>) 151 (3 %,  $[\text{M} + \text{Na}]^+$ ), 129 (100 %,  $[\text{M} + \text{H}]^+$ ); HR-MS (ESI<sup>+</sup>)  $\text{C}_6\text{H}_8\text{NaO}_3$   $[\text{M} + \text{Na}]^+$  calculated 151.0366, observed 151.0361.

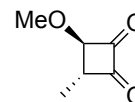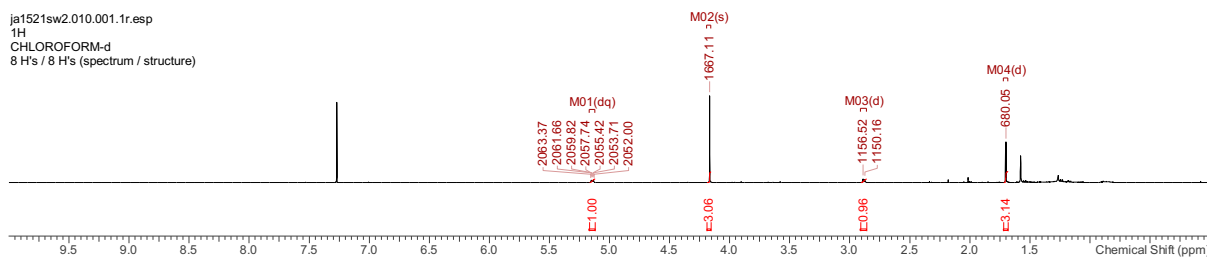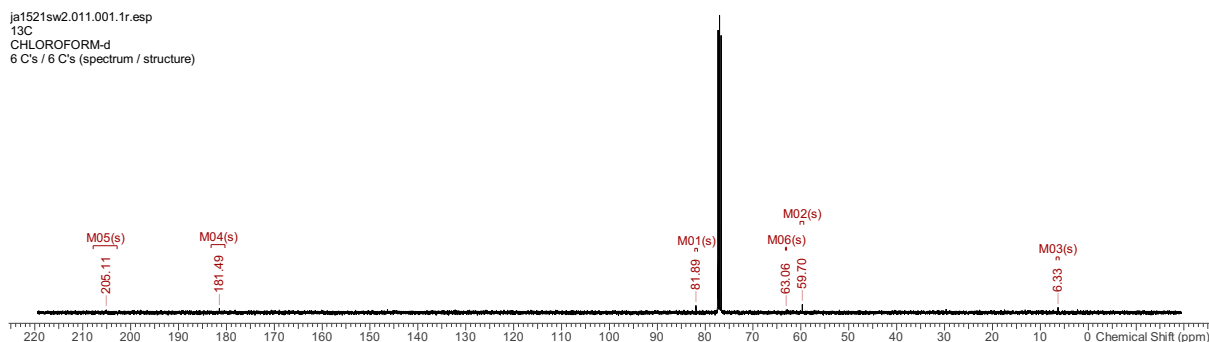

### 5-(*tert*-Butyl)-*N,N*-diisopropyl-3,4-dimethoxyfuran-2-carboxamide, **8a**

To a solution of cyclobutenedione **1a** (142 mg, 1.0 mmol) in THF (30 mL) at  $-78\text{ }^{\circ}\text{C}$  was added LDA (2.0 M in THF/ethylbenzene/hexanes, 0.55 mL, 1.10 mmol) dropwise. After 90 min, trimethylacetaldehyde (0.14 mL, 1.3 mmol) was added. After a further 30 min the reaction mixture was warmed to RT for 2 h then returned to  $-78\text{ }^{\circ}\text{C}$ . TFAA (0.18 mL, 1.2 mmol) was added, followed after 90 min by water (10 mL). On warming to RT, the aqueous phase was separated and extracted with DCM (3 $\times$ 20 mL). The organic phases were then combined, dried over  $\text{MgSO}_4$ , concentrated *in vacuo* and purified by column chromatography (5–10 % EtOAc/petrol) to give the title compound **8a** (103 mg, 0.33 mmol, 33 %) as a yellow oil,  $\nu_{\text{max}}$  (film) 2967 (m), 2934 (w), 1622 (s), 1571 (m), 1483 (w), 1462 (w), 1408 (m), 1369 (m), 1340 (s), 1288 (m);  $\delta_{\text{H}}$  (500 MHz,  $\text{DMSO-d}_6$ , 373 K) 3.82 (s, 3H,  $\text{OCH}_3$ ), 3.78 (spt,  $J = 6.7$  Hz, 2H, 2 $\times$ NCH), 3.73 (s, 3H,  $\text{OCH}_3$ ), 1.31 (d,  $J = 6.8$  Hz, 12H,  $\text{N}(\text{CH}(\text{CH}_3)_2)_2$ ), 1.28 (s, 9H,  $\text{C}(\text{CH}_3)_3$ );  $\delta_{\text{C}}$  (126 MHz,  $\text{DMSO-d}_6$ , 373 K) 159.6 (C), 146.6 (C), 142.8 (C), 134.6 (C), 129.4 (C), 60.3 (CH<sub>3</sub>), 59.4 (CH<sub>3</sub>), 46.9 (br, 2 $\times$ CH), 32.0 (C), 27.7 (3 $\times$ CH<sub>3</sub>), 20.1 (4 $\times$ CH<sub>3</sub>); LRMS (ESI<sup>+</sup>) 312 (100 %,  $[\text{MH}]^+$ ); HRMS (ESI<sup>+</sup>)

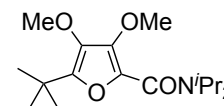

$C_{17}H_{29}NNaO_4$   $[M+Na]^+$  calculated 334.1989, observed 334.1991;  $C_{17}H_{30}NO_4$   $[MH]^+$  calculated 312.2169, observed 312.2173.

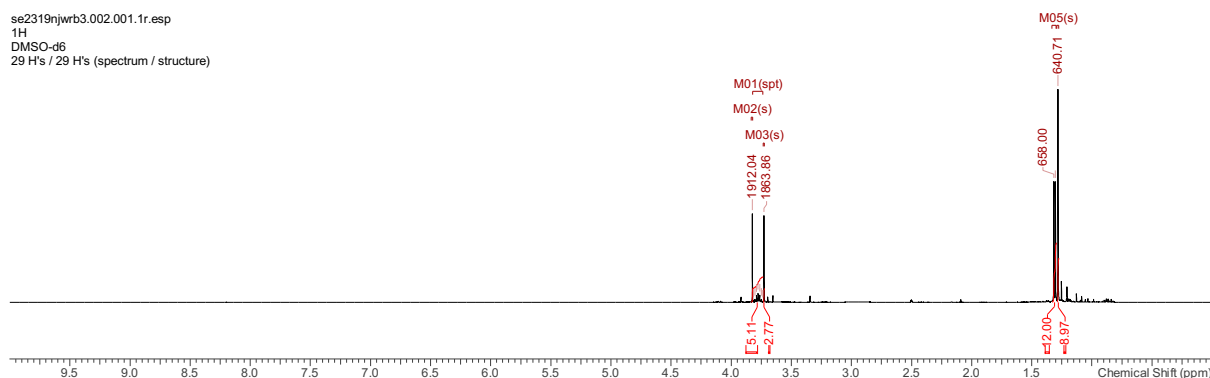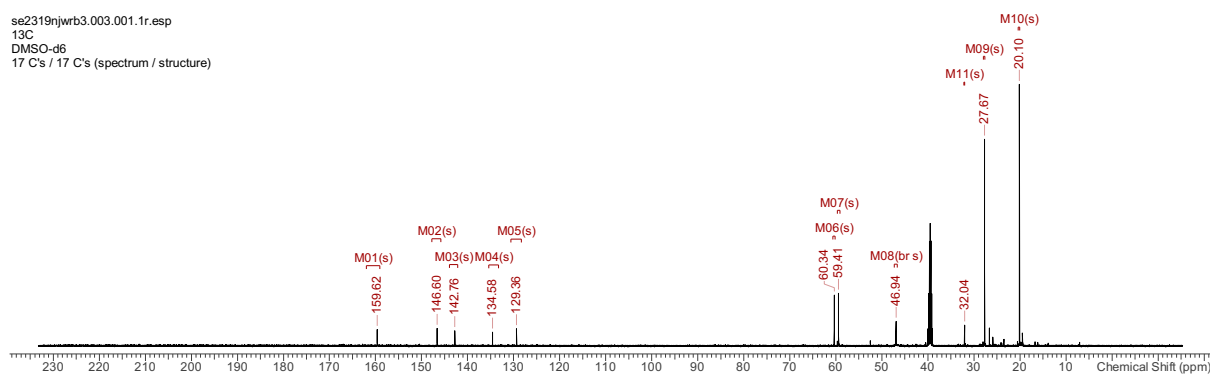

### *N,N*-Diisopropyl-3,4-dimethoxy-5-phenylfuran-2-carboxamide, **8b**

To a solution of cyclobutenedione **1a** (142 mg, 1.0 mmol) in THF (30 mL) at  $-78^\circ\text{C}$  was added LDA (2.0 M in THF/ethylbenzene/hexanes, 0.55 mL, 1.10 mmol) dropwise. After 90 min, benzaldehyde (0.12 mL, 1.2 mmol) was added. After a further 30 min the reaction mixture was warmed to RT for 2 h then returned to  $-78^\circ\text{C}$ . TFAA (0.18 mL, 1.2 mmol) was added, followed after 90 min by water (10 mL). On warming to RT, the aqueous phase was separated and extracted with DCM ( $3 \times 20$  mL). The organic phases were then combined, dried over  $\text{MgSO}_4$ , concentrated *in vacuo* and purified by column chromatography (5–10 % EtOAc/petrol) to give the title compound **8b** (102 mg, 0.31 mmol, 31 %) as a yellow oil,  $\nu_{\text{max}}$  (film) 2971 (m), 2936 (w), 2359 (m), 2343 (w), 1623 (s), 1580 (w), 1559 (w), 1465 (s), 1448 (s), 1410 (m);  $\delta_{\text{H}}$  (500 MHz, DMSO- $d_6$ , 373 K) 7.73–7.69 (m, 2H,  $2 \times \text{ArH}$ ), 7.47–7.42 (m, 2H,  $2 \times \text{ArH}$ ), 7.32–7.27 (m, 1H, ArH), 3.91 (s, 3H,  $\text{OCH}_3$ ), 3.90 (s, 3H,  $\text{OCH}_3$ ), 3.87 (spt,  $J = 6.7$  Hz, 2H,  $2 \times \text{NCH}$ ), 1.35 (d,  $J = 6.8$  Hz, 12H,  $\text{N}(\text{CH}(\text{CH}_3)_2)_2$ );  $\delta_{\text{C}}$  (126 MHz, DMSO- $d_6$ , 373 K) 159.3 (C), 142.4 (C), 137.1 (C), 136.8 (C), 131.6 (C), 128.9 (C), 128.2 ( $2 \times \text{CH}$ ), 126.8 (CH), 122.9 ( $2 \times \text{CH}$ ), 59.83 ( $\text{CH}_3$ ), 59.80 ( $\text{CH}_3$ ), 47.2 (br,  $2 \times \text{CH}$ ), 20.1 ( $4 \times \text{CH}_3$ ); LRMS (ESI $^+$ ) 332 (100 %,  $[\text{MH}]^+$ ); HRMS (ESI $^+$ )  $C_{19}H_{25}NNaO_4$   $[M+Na]^+$  calculated 354.1676, observed 354.1682;  $C_{19}H_{26}NO_4$   $[\text{MH}]^+$  calculated 332.1856, observed 332.1863.

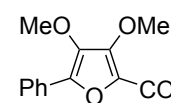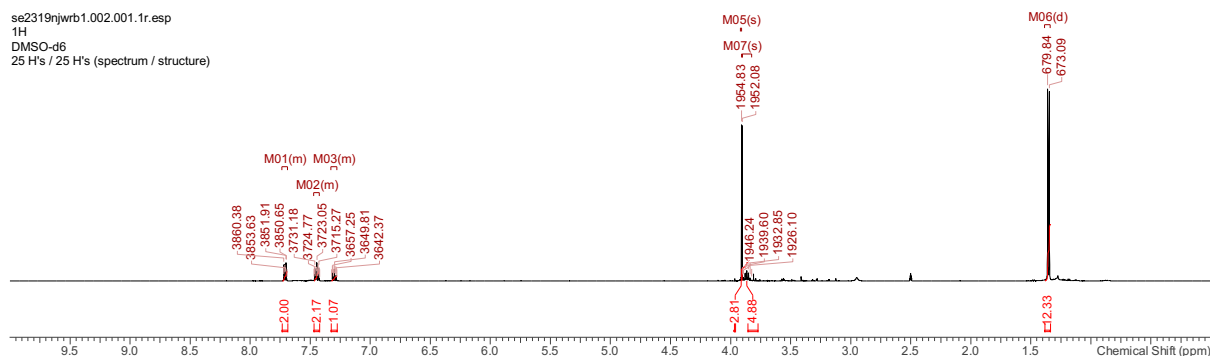

se2319njwrb1.003.001.1r.esp  
13C  
DMSO-d6  
19 C's / 19 C's (spectrum / structure)

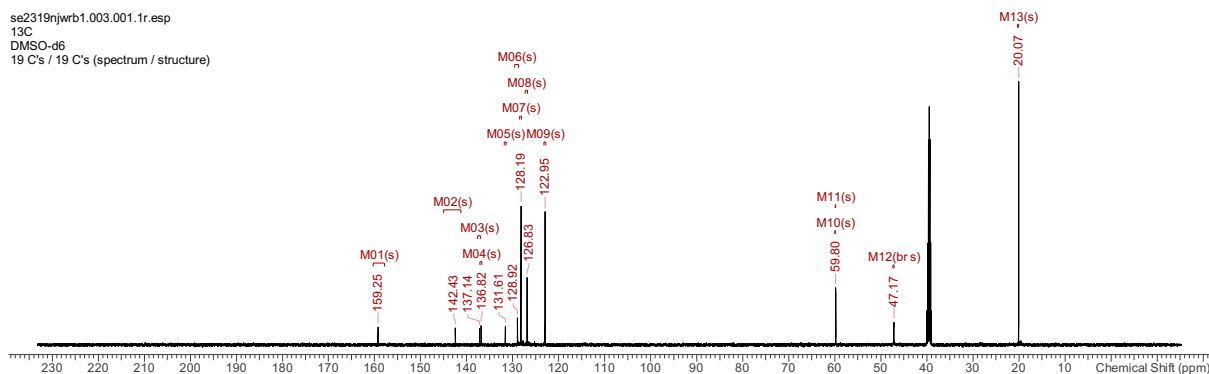

### 3,4-Diisopropoxy-N,N-diisopropyl-5-phenethylfuran-2-carboxamide, **8c**

To a solution of cyclobutenedione **1b** (198 mg, 1.0 mmol) in THF (30 mL) at  $-78\text{ }^{\circ}\text{C}$  was added LDA (2.0 M in THF/ethylbenzene/hexanes, 0.55 mL, 1.10 mmol) dropwise. After 90 min, 3-phenylpropionaldehyde (0.16 mL, 1.2 mmol) was added. After a further 30 min the reaction mixture was warmed to RT for 2 h then returned to  $-78\text{ }^{\circ}\text{C}$ . TFAA (0.18 mL, 1.2 mmol) was added, followed after 90 min by water (10 mL). On warming to RT, the aqueous phase was separated and extracted with DCM (3 $\times$ 20 mL). The organic phases were then combined, dried over  $\text{MgSO}_4$ , concentrated *in vacuo* and purified by column chromatography (5–10 % EtOAc/petrol) to give the title compound **8c** (170 mg, 0.41 mmol, 41 %) as a yellow oil, FT-IR ( $\nu_{\text{max}}$ ,  $\text{CHCl}_3$ ) 2972 (s), 2931 (m), 2360 (w), 1624 (s), 1570 (w), 1497 (w), 1453 (m), 1421 (w), 1371 (s), 1359 (w)  $\text{cm}^{-1}$ ;  $\delta_{\text{H}}$  (500 MHz, DMSO- $d_6$ , 373 K) 7.27–7.22 (m, 2H, 2 $\times$ ArH), 7.20–7.13 (m, 3H, 3 $\times$ ArH), 4.47 (spt,  $J = 6.1$  Hz, 1H, OCH), 4.14 (spt,  $J = 6.1$  Hz, 1H, OCH), 3.75 (spt,  $J = 6.7$  Hz, 2H, 2 $\times$ NCH), 2.93–2.87 (m, 2H,  $\text{CH}_2$ ), 2.85–2.79 (m, 2H,  $\text{CH}_2$ ), 1.28 (d,  $J = 6.7$  Hz, 12H, N(CH( $\text{CH}_3$ ) $_2$ ) $_2$ ), 1.20 (d,  $J = 6.1$  Hz, 6H, OCH( $\text{CH}_3$ ) $_2$ ), 1.17 (d,  $J = 6.1$  Hz, 6H, OCH( $\text{CH}_3$ ) $_2$ );  $\delta_{\text{C}}$  (126 MHz, DMSO- $d_6$ , 373 K) 159.7 (C), 140.9 (C), 140.2 (C), 139.1 (C), 134.7 (C), 132.1 (C), 127.58 (2 $\times$ CH), 127.57 (2 $\times$ CH), 125.3 (CH), 74.2 (CH), 73.8 (CH), 46.9 (br, 2 $\times$ CH), 32.4 ( $\text{CH}_2$ ), 26.5 ( $\text{CH}_2$ ), 21.5 (2 $\times$  $\text{CH}_3$ ), 21.2 (2 $\times$  $\text{CH}_3$ ), 20.1 (4 $\times$  $\text{CH}_3$ ); LRMS (ESI $^+$ ) 416 (100 %, [MH] $^+$ ); HRMS (ESI $^+$ )  $\text{C}_{25}\text{H}_{37}\text{NNaO}_4$  [M+Na] $^+$  calculated 438.2615, observed 438.2621;  $\text{C}_{25}\text{H}_{38}\text{NO}_4$  [MH] $^+$  calculated 416.2795, observed 416.2802.

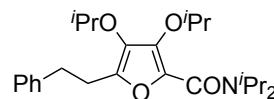

se2319njwrb4.002.001.1r.esp  
1H  
DMSO-d6  
37 H's / 37 H's (spectrum / structure)

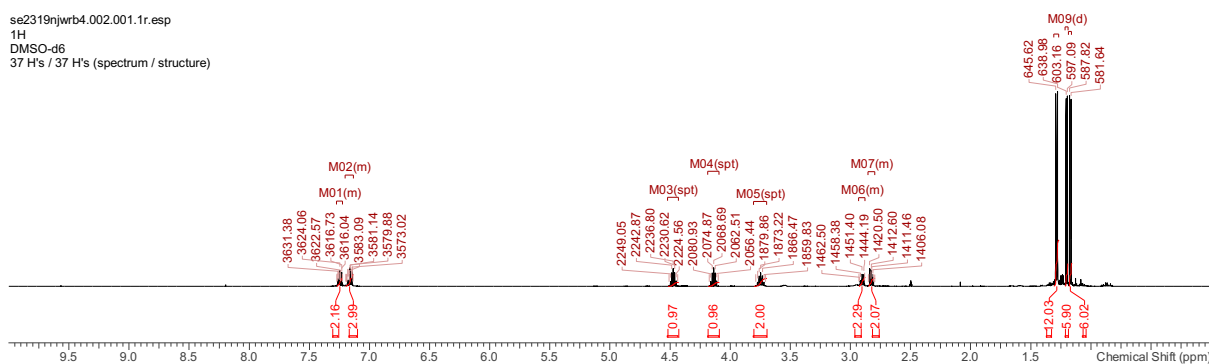

se2319njwrb4.003.001.1r.esp  
13C  
DMSO-d6  
25 C's / 25 C's (spectrum / structure)

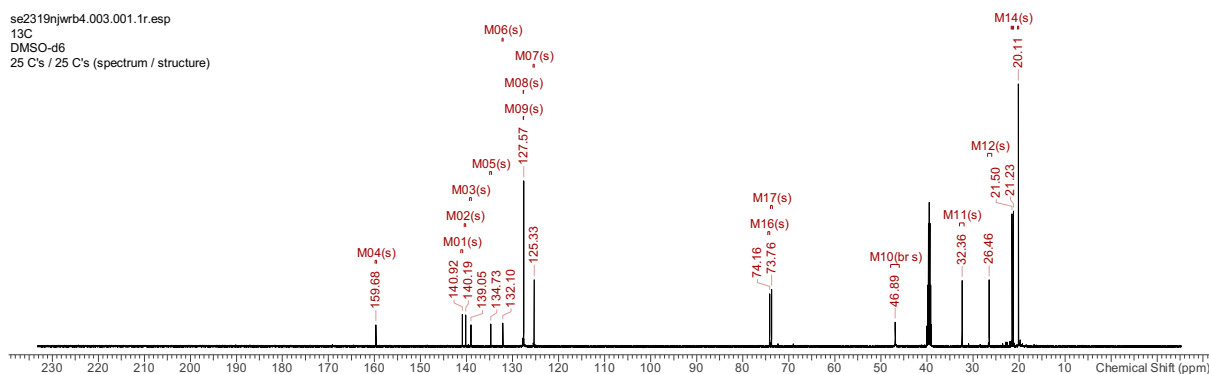

### 3,4-Diisopropoxy-*N,N*-diisopropyl-5-(4-methoxyphenyl)furan-2-carboxamide, **8d**

To a solution of cyclobutenedione **1b** (155 mg, 1.0 mmol) in THF (30 mL) at  $-78^{\circ}\text{C}$  was added LDA (2.0 M in THF/ethylbenzene/hexanes, 0.55 mL, 1.10 mmol) dropwise. After 90 min, *p*-anisaldehyde (0.15 mL, 1.2 mmol) was added. After a further 30 min the reaction mixture was warmed to RT for 2 h then returned

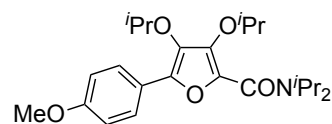

to  $-78^{\circ}\text{C}$ . TFAA (0.18 mL, 1.2 mmol) was added, followed after 90 min by sat. sodium bisulfite (10 mL). On warming to RT, the aqueous phase was separated and extracted with DCM (3 $\times$ 20 mL). The organic phases were then combined, dried over  $\text{MgSO}_4$ , concentrated *in vacuo* and purified by column chromatography (5–10 % EtOAc/petrol) to give the title compound **8d** (155 mg, 0.37 mmol, 37 %) as a yellow oil,  $\nu_{\text{max}}$  (film) 2975 (m), 2935 (w), 1621 (s), 1562 (w), 1509 (s), 1456 (s), 1426 (m), 1373 (s), 1336 (m), 1300 (m);  $\delta_{\text{H}}$  (500 MHz, DMSO- $d_6$ , 373 K) 7.73–7.67 (m, 2H, 2 $\times$ ArH), 7.05–6.99 (m, 2H, 2 $\times$ ArH), 4.57 (spt,  $J = 6.2$  Hz, 1H, OCH), 4.51 (spt,  $J = 6.2$  Hz, 1H, OCH), 3.85 (spt,  $J = 6.7$  Hz, 2H, N(CH(CH $_3$ ) $_2$ ) $_2$ ), 3.81 (s, 3H, OCH $_3$ ), 1.34 (d,  $J = 6.7$  Hz, 12H, N(CH(CH $_3$ ) $_2$ ) $_2$ ), 1.29 (d,  $J = 6.2$  Hz, 6H, OCH(CH $_3$ ) $_2$ ), 1.27 (d,  $J = 6.2$  Hz, 6H, OCH(CH $_3$ ) $_2$ );  $\delta_{\text{C}}$  (126 MHz, DMSO- $d_6$ , 373 K) 159.5 (C), 158.3 (C), 140.0 (C), 138.3 (C), 134.3 (C), 132.1 (C), 124.5 (2 $\times$ CH), 122.1 (C), 113.9 (2 $\times$ CH), 74.22 (CH), 74.17 (CH), 54.8 (CH $_3$ ), 47.1 (br, 2 $\times$ CH), 21.6 (2 $\times$ CH $_3$ ), 21.3 (2 $\times$ CH $_3$ ), 20.1 (4 $\times$ CH $_3$ ); LRMS (ESI $^+$ ) 418 (100 %, [MH] $^+$ ); HRMS (ESI $^+$ ) C $_{24}$ H $_{35}$ NNaO $_5$  [M+Na] $^+$  calculated 440.2407, observed 440.2409; C $_{24}$ H $_{36}$ NO $_5$  [MH] $^+$  calculated 418.2588, observed 418.2596.

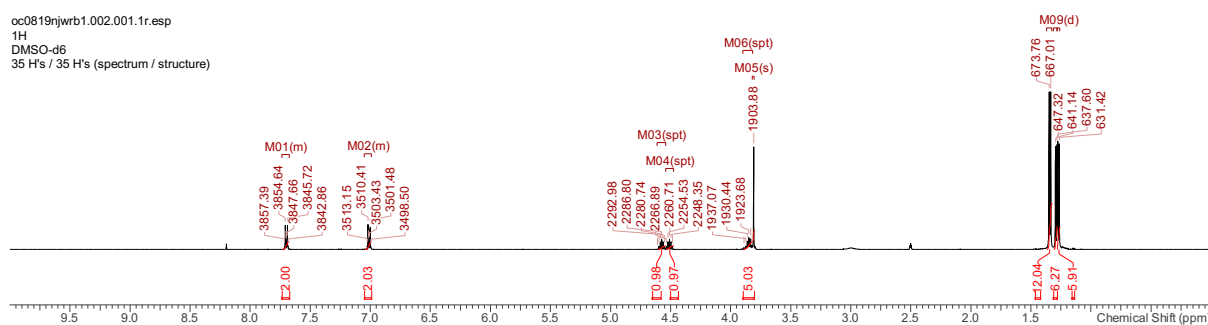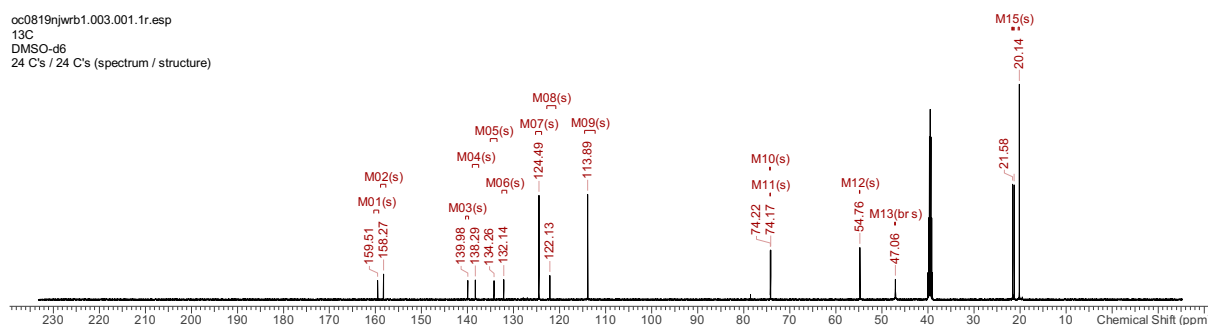

### 4-(Dimethylamino)-*N,N*-diisopropyl-3-methoxy-5-(1-methyl-1*H*-pyrrol-2-yl)furan-2-carboxamide, **8e**

To a solution of cyclobutenedione **9a** (155 mg, 1.0 mmol) in THF (30 mL) at  $-78^{\circ}\text{C}$  was added LDA (2.0 M in THF/ethylbenzene/hexanes, 0.55 mL, 1.10 mmol) dropwise. After 90 min, *N*-methyl-2-pyrrolicarboxaldehyde (0.13 mL, 1.2 mmol) was added. After a further 30 min the reaction mixture was warmed to RT for 2 h then returned

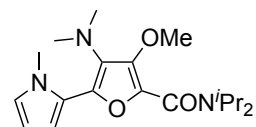

to  $-78^{\circ}\text{C}$ . TFAA (0.18 mL, 1.2 mmol) was added, followed after 90 min by sat. sodium bisulfite (10 mL). On warming to RT, the aqueous phase was separated and extracted with DCM (3 $\times$ 20 mL). The organic phases were then combined, dried over  $\text{MgSO}_4$ , concentrated *in vacuo* and purified by column chromatography (10–15 % EtOAc/petrol) to give the title compound **8e** (131 mg, 0.38 mmol, 38 %) as a yellow oil,  $\nu_{\text{max}}$  (film) 2970 (m), 2934 (w), 2791 (w), 2360 (w), 1625 (s), 1527 (w), 1458 (s), 1395 (w), 1370 (m), 1346 (s);  $\delta_{\text{H}}$  (500 MHz, DMSO- $d_6$ , 373 K) 6.82 (dd,  $J = 2.7, 1.8$  Hz, 1H, ArH), 6.23 (dd,  $J = 3.7, 1.7$  Hz, 1H, ArH), 6.07 (dd,  $J = 3.6, 2.7$  Hz, 1H, ArH), 3.83 (s, 3H, OCH $_3$ ), 3.81 (spt,  $J = 6.7$  Hz, 2H, N(CH(CH $_3$ ) $_2$ ) $_2$ ), 3.56 (s, 3H, NCH $_3$ ), 2.60 (s, 6H, N(CH $_3$ ) $_2$ ), 1.31 (d,  $J = 6.8$  Hz, 12H, N(CH(CH $_3$ ) $_2$ ) $_2$ );  $\delta_{\text{C}}$  (126 MHz, DMSO- $d_6$ , 373 K) 160.0 (C), 143.8 (C), 132.3 (C), 132.2 (C), 130.3 (C), 123.5 (CH), 122.3 (C), 111.9 (CH), 106.8 (CH), 59.5 (CH $_3$ ), 47.0 (br, 2 $\times$ CH), 42.1 (2 $\times$ CH $_3$ ), 33.7 (CH $_3$ ), 20.0 (4 $\times$ CH $_3$ ); LRMS (ESI $^+$ ) 348 (100 %, [MH] $^+$ ); HRMS (ESI $^+$ ) C $_{19}$ H $_{29}$ N $_3$ NaO $_3$  [M+Na] $^+$  calculated 370.2101, observed 370.2102; C $_{19}$ H $_{30}$ N $_3$ O $_3$  [MH] $^+$  calculated 348.2282, observed 348.2290.

se2319njwrb5.002.001.1r.esp  
1H  
DMSO-d6  
29 H's / 29 H's (spectrum / structure)

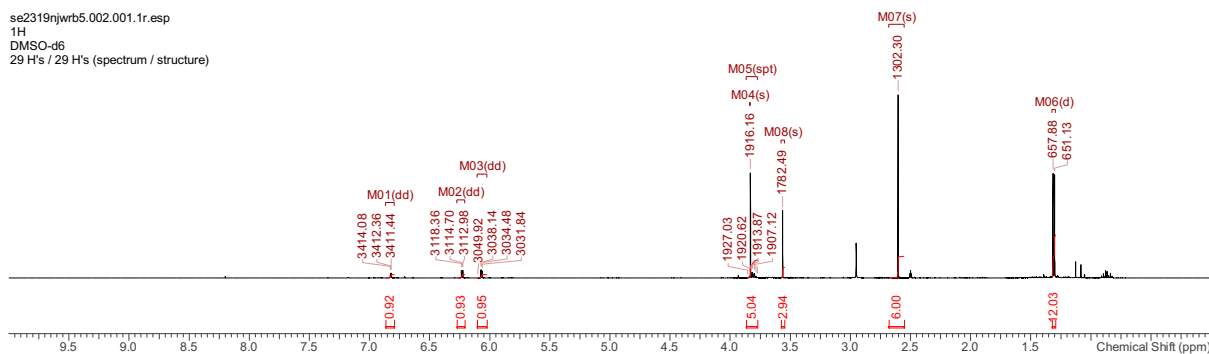

se2319njwrb5.003.001.1r.esp  
13C  
DMSO-d6  
19 C's / 19 C's (spectrum / structure)

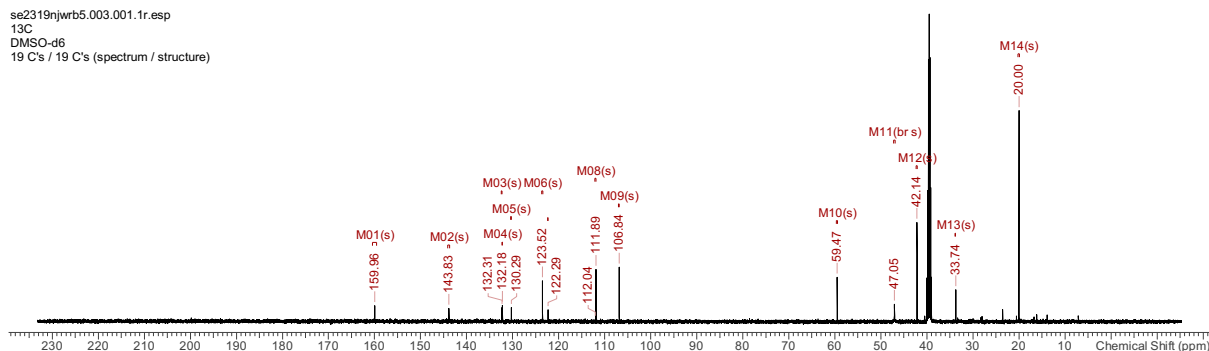

### 3-(Benzylamino)cyclobut-3-ene-1,2-dione, **26** and (*E*)-*N*-benzyl-4-(benzylamino)-2-oxobut-3-enamide, **27**

To 3-isopropoxycyclobut-3-ene-1,2-dione **25** (538 mg, 3.84 mmol) in *i*PrOH (30 mL) at 0 °C was added benzylamine (0.63 mL, 5.77 mmol) dropwise. After 1 h, the solution was warmed to RT, concentrated *in vacuo* and purified by column chromatography (10–30% EtOAc/petrol) to afforded firstly the title compound **27** (288 mg, 0.98 mmol, 25%) as a cream solid, m.p. 120–122 °C;  $\nu_{\max}$  (neat) 3379 (br m), 3321 (br m), 3089 (w), 3060 (w), 3029 (w), 2924 (w), 2873 (w), 1674 (m), 1628 (s), 1569 (m), 1514 (m), 1482 (s), 1453 (m), 1359 (br w), 1291 (br m), 1236 (br m);  $\delta_{\text{H}}$  (400 MHz, CDCl<sub>3</sub>) 10.53 (br s, 1H, NH), 7.66 (br s, 1H, NH), 7.40–7.25 (m, 10H, 10×ArH), 7.21 (dd, *J* = 13.2, 7.2 Hz, 1H, NHCH=CH), 6.17 (d, *J* = 7.2 Hz, 1H, NHCH=CH), 4.51 (s, 2H, CH<sub>2</sub>), 4.50 (s, 2H, CH<sub>2</sub>);  $\delta_{\text{C}}$  (100 MHz, CDCl<sub>3</sub>) 182.0 (C), 163.0 (C), 157.1 (CH), 137.8 (C), 136.6 (C), 129.0 (2×CH), 128.7 (2×CH), 128.1 (CH), 127.8 (2×CH), 127.5 (CH), 127.2 (2×CH), 89.6 (CH), 53.1 (CH<sub>2</sub>), 43.3 (CH<sub>2</sub>); LRMS (ESI<sup>+</sup>) 317 ([M+Na]<sup>+</sup>, 37%), 295 ([MH]<sup>+</sup>, 100%); HRMS (ESI<sup>+</sup>) C<sub>18</sub>H<sub>18</sub>N<sub>2</sub>NaO<sub>2</sub> [M+Na]<sup>+</sup> calculated 317.1260, observed 317.1266; X-ray CCDC CCDC1500038; then cyclobutenedione **26** (291 mg, 1.55 mmol, 40%) as a brown solid, m.p. 89–91 °C;  $\nu_{\max}$  (neat) 3199 (br m), 3091 (br w), 2991 (br w), 1775 (s), 1740 (s), 1595 (s), 1453 (m), 1356 (m), 1107 (m);  $\delta_{\text{H}}$  (400 MHz, CDCl<sub>3</sub>) major rotamer: 7.92 (s, 1H, CH), 7.44–7.29 (m, 5H, 5×ArH), 6.86 (br s, 1H, NH), 4.53 (d, *J* = 5.6 Hz, 2H, CH<sub>2</sub>), minor rotamer: 8.00 (s, 1H, CH), 7.44–7.29 (m, 5H, 5×ArH), 6.62 (br s, 1H, NH), 4.90 (d, *J* = 6.5 Hz, 2H, CH<sub>2</sub>);  $\delta_{\text{C}}$  (100 MHz, CDCl<sub>3</sub>) 195.0 (C), 190.4 (C), 185.5 (C), 152.5 (CH), 134.5 (C), 129.3 (2×CH), 128.8 (CH), 127.7 (2×CH), 50.1 (CH<sub>2</sub>), minor rotamer: 195.0 (C), 190.4 (C), 185.5 (C), 154.2 (CH), 134.5 (C), 129.1 (2×CH), 128.4 (CH), 127.9 (2×CH), 48.8 (CH<sub>2</sub>); LRMS (ESI<sup>+</sup>) 210 ([M+Na]<sup>+</sup>, 16%), 188 ([MH]<sup>+</sup>, 100%); HRMS (ESI<sup>+</sup>) C<sub>11</sub>H<sub>10</sub>NO<sub>2</sub> [MH]<sup>+</sup> calculated 188.0706, observed 188.0708.

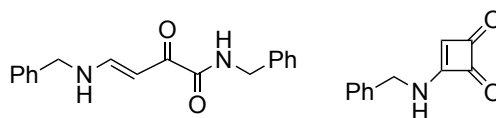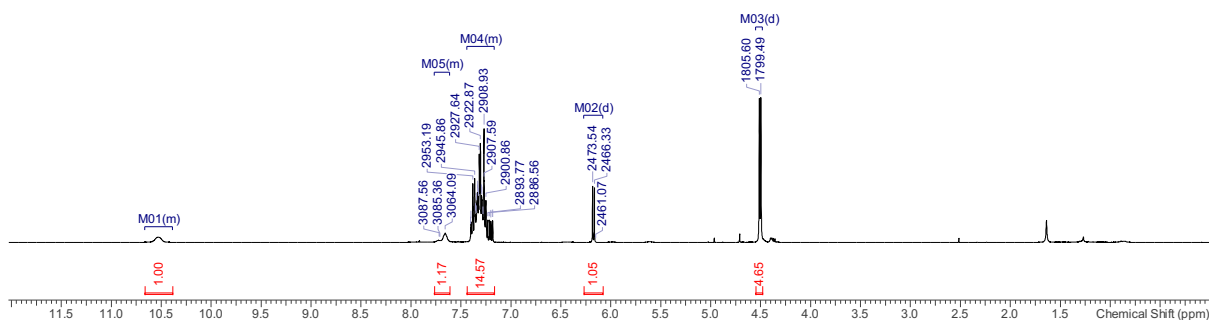

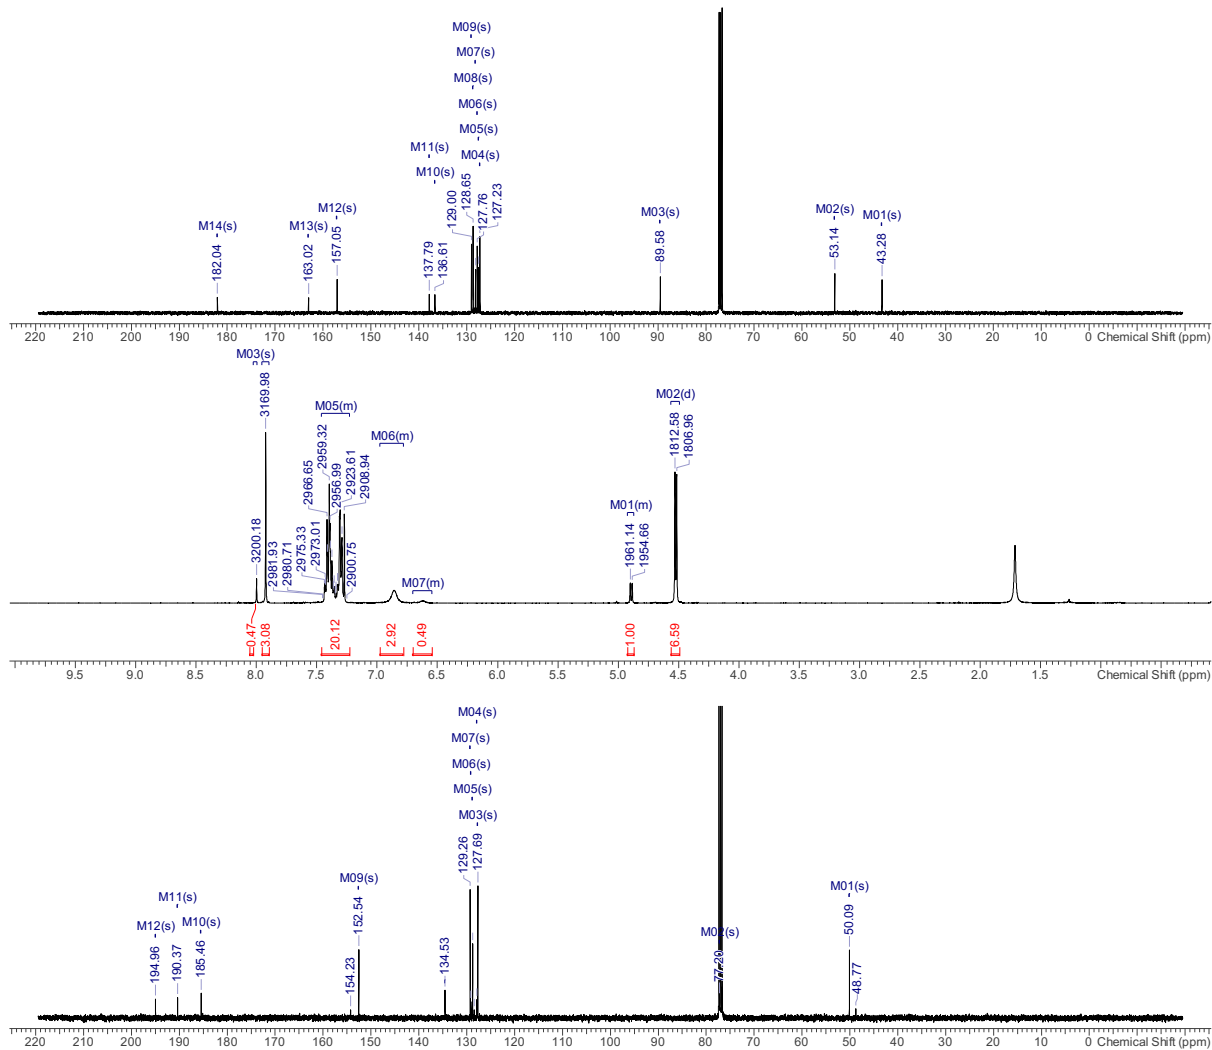

### 3. DFT Calculations

DFT calculations for Figures 1 and 2 were carried out with the Gaussian 09W C.01 program.<sup>10</sup> Gibbs free energies ( $\Delta G$ ) were calculated at the B3LYP/6-31G(d) and M062X/6-31G(d) level of theory. The geometries of all intermediate species were optimized and confirmed by the absence of imaginary frequencies. The transition states were found by relaxed scans of the bond distance between atoms directly involved and checked by the existence of a single imaginary frequency corresponding to their reaction coordinates.

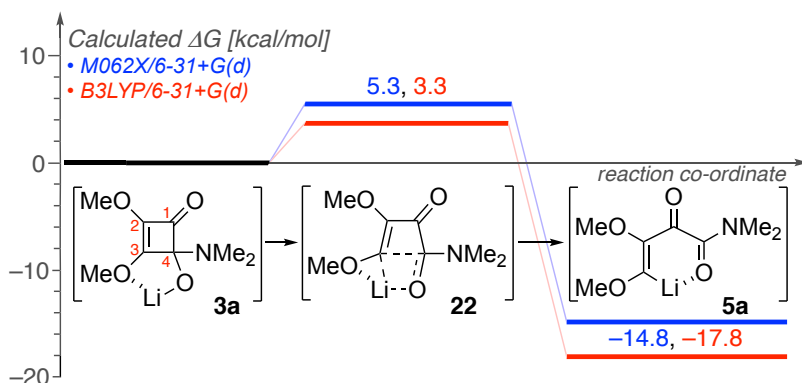

| Compound  | Calculations                                | Hartree/particle |                |
|-----------|---------------------------------------------|------------------|----------------|
|           |                                             | B3LYP/6-31G(d)   | M062X/6-31G(d) |
| <b>3a</b> | Zero-point correction                       | 0.201314         | 0.203857       |
|           | Thermal correction to Energy                | 0.217258         | 0.219601       |
|           | Thermal correction to Enthalpy              | 0.218203         | 0.220545       |
|           | Thermal correction to Gibbs Free Energy     | 0.158308         | 0.160848       |
|           | Sum of electronic and zero-point Energies   | -674.992487      | -674.730872    |
|           | Sum of electronic and thermal Energies      | -674.976543      | -674.715128    |
|           | Sum of electronic and thermal Enthalpies    | -674.975598      | -674.714184    |
|           | Sum of electronic and thermal Free Energies | -675.035493      | -674.773881    |
| <b>20</b> | Zero-point correction                       | 0.200543         | 0.203102       |
|           | Thermal correction to Energy                | 0.216085         | 0.218379       |
|           | Thermal correction to Enthalpy              | 0.217029         | 0.219323       |
|           | Thermal correction to Gibbs Free Energy     | 0.157810         | 0.160502       |
|           | Sum of electronic and zero-point Energies   | -674.987565      | -674.722804    |
|           | Sum of electronic and thermal Energies      | -674.972023      | -674.707527    |
|           | Sum of electronic and thermal Enthalpies    | -674.971079      | -674.706583    |
|           | Sum of electronic and thermal Free Energies | -675.030299      | -674.765405    |
| <b>5a</b> | Zero-point correction                       | 0.202140         | 0.204567       |
|           | Thermal correction to Energy                | 0.218159         | 0.220355       |
|           | Thermal correction to Enthalpy              | 0.219103         | 0.221299       |
|           | Thermal correction to Gibbs Free Energy     | 0.158699         | 0.161408       |
|           | Sum of electronic and zero-point Energies   | -675.020443      | -674.754326    |
|           | Sum of electronic and thermal Energies      | -675.004425      | -674.738537    |
|           | Sum of electronic and thermal Enthalpies    | -675.003481      | -674.737593    |
|           | Sum of electronic and thermal Free Energies | -675.063885      | -674.797485    |



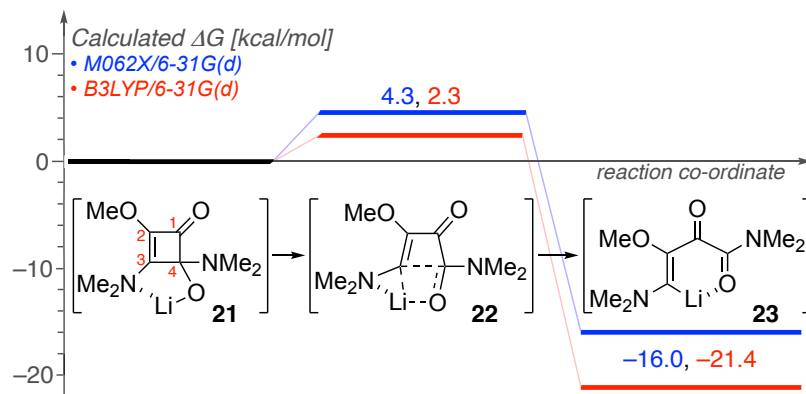

| Compound  | Calculations                                | Hartree/particle |                |
|-----------|---------------------------------------------|------------------|----------------|
|           |                                             | B3LYP/6-31G(d)   | M062X/6-31G(d) |
| <b>21</b> | Zero-point correction                       | 0.242442         | 0.246389       |
|           | Thermal correction to Energy                | 0.259720         | 0.263110       |
|           | Thermal correction to Enthalpy              | 0.260665         | 0.264054       |
|           | Thermal correction to Gibbs Free Energy     | 0.198278         | 0.203286       |
|           | Sum of electronic and zero-point Energies   | -694.404812      | -694.106618    |
|           | Sum of electronic and thermal Energies      | -694.387533      | -694.089897    |
|           | Sum of electronic and thermal Enthalpies    | -694.386589      | -694.088953    |
|           | Sum of electronic and thermal Free Energies | -694.448976      | -694.149721    |
| <b>22</b> | Zero-point correction                       | 0.241687         | 0.245158       |
|           | Thermal correction to Energy                | 0.258562         | 0.261709       |
|           | Thermal correction to Enthalpy              | 0.259507         | 0.262653       |
|           | Thermal correction to Gibbs Free Energy     | 0.198016         | 0.201720       |
|           | Sum of electronic and zero-point Energies   | -694.401664      | -694.099388    |
|           | Sum of electronic and thermal Energies      | -694.384788      | -694.082837    |
|           | Sum of electronic and thermal Enthalpies    | -694.383844      | -694.081893    |
|           | Sum of electronic and thermal Free Energies | -694.445334      | -694.142826    |
| <b>23</b> | Zero-point correction                       | 0.242647         | 0.246285       |
|           | Thermal correction to Energy                | 0.260478         | 0.263700       |
|           | Thermal correction to Enthalpy              | 0.261422         | 0.264644       |
|           | Thermal correction to Gibbs Free Energy     | 0.196716         | 0.201275       |
|           | Sum of electronic and zero-point Energies   | -694.437143      | -694.130139    |
|           | Sum of electronic and thermal Energies      | -694.419312      | -694.112724    |
|           | Sum of electronic and thermal Enthalpies    | -694.418367      | -694.111780    |
|           | Sum of electronic and thermal Free Energies | -694.483073      | -694.175150    |

#### 4. References for Supporting Information

1. H. Liu, C. S. Tomooka, S. L. Xu, B. R. Yerxa, R. W. Sullivan, Y. Xiong, H. W. Moore, S. Manabe and K. Koga, *Org. Synth.*, 1999, **76**, 189; M. Mohamed, T. P. Goncalves, R. J. Whitby, H. F. Sneddon and D. C. Harrowven, *Chem. Eur. J.*, 2011, **17**, 13698; D. J. Asby, M. G. Radigois, D. C. Wilson, F. Cuda, C. L. L. Chai, A. Chen, A. S. Bienemann, M. E. Light, D. C. Harrowven and A. Tavassoli, *Org. Biomol. Chem.*, 2016, **4**, 9330.
2. E. Packard, D. D. Pascoe, J. Maddaluno, T. P. Goncalves and D. C. Harrowven, *Angew. Chem. Int. Ed.*, 2013, **52**, 13076.
3. L. S. Liebeskind, R. W. Fengl, K. R. Wirtz and T. T. Shawe, *J. Org. Chem.*, 1988, **53**, 2482.
4. H. Liu, C. S. Tomooka and H. W. Moore, *Synth. Commun.*, 1997, **27**, 2177; T. P. Goncalves, M. Mohamed, R. J. Whitby, H. F. Sneddon and D. C. Harrowven, *Angew. Chem. Int. Ed.*, 2015, **54**, 4531.
5. M. W. Reed, D. J. Pollart, S. T. Perri, L. D. Foland and H. W. Moore, *J. Org. Chem.*, 1988, **53**, 2477; F. Liu and L. S. Liebeskind, *J. Org. Chem.*, 1998, **63**, 2835.
6. K. E. Benenato, E. S. Kumarasinghe and M. Cornebise, *WO Pat.* 2017, 49245; K. E. Benenato, E. S. Kumarasinghe and M. Cornebise, *WO Pat.* 2018, 170306.
7. L. S. Liebeskind, R. W. Fengl, K. R. Wirtz and T. T. Shawe, *J. Org. Chem.*, 1988, **53**, 2482; H. Tsukamoto, S. Hanada, Y. Nomura and T. Doi, *J. Org. Chem.*, 2018, **83**, 9430.
8. K. Koehler, G. Offermann and G. Seitz, *Chem. Ber.*, 1986, **119**, 182.
9. N. Fu, A. D. Allen, S. Kobayashi, T. T. Tidwell, S. Vukovic, S. Arumugam, V. V. Popik and M. Mishima, *J. Org. Chem.*, 2007, **72**, 1951.
10. Gaussian 09, Revision C.01, M. J. Frisch, G. W. Trucks, H. B. Schlegel, G. E. Scuseria, M. A. Robb, J. R. Cheeseman, G. Scalmani, V. Barone, B. Mennucci, G. A. Petersson, H. Nakatsuji, M. Caricato, X. Li, H. P. Hratchian, A. F. Izmaylov, J. Bloino, G. Zheng, J. L. Sonnenberg, M. Hada, M. Ehara, K. Toyota, R. Fukuda, J. Hasegawa, M. Ishida, T. Nakajima, Y. Honda, O. Kitao, H. Nakai, T. Vreven, J. A. Montgomery Jr., J. E. Peralta, F. Ogliaro, M. Bearpark, J. J. Heyd, E. Brothers, K. N. Kudin, V. N. Staroverov, R. Kobayashi, J. Normand, K. Raghavachari, A. Rendell, J. C. Burant, S. S. Iyengar, J. Tomasi, M. Cossi, N. Rega, N. J. Millam, M. Klene, J. E. Knox, J. B. Cross, V. Bakken, C. Adamo, J. Jaramillo, R. Gomperts, R. E. Stratmann, O. Yazyev, A. J. Austin, R. Cammi, C. Pomelli, J. W. Ochterski, R. L. Martin, K. Morokuma, V. G. Zakrzewski, G. A. Voth, P. Salvador, J. J. Dannenberg, S. Dapprich, A. D. Daniels, Ö. Farkas, J. B. Foresman, J. V. Ortiz, J. Cioslowski and D. J. Fox, Gaussian Inc., Wallingford CT, 2009.
